# Supplementary material
Source: PubMed Central journal article supplement (PMC2761719)
Supplement: NIHMS134994-supplement-Supplementary_data.pdf [file NIHMS134994-supplement-Supplementary_data.pdf]

**Table S1. Comparison of transcript levels relative to wild type between *P. aeruginosa* *retS* and *retSgacS* double mutants.** Transcriptomes of the *retS* and the wt strains have been published previously (Goodman *et al.*, 2004) Only those genes whose transcript levels changed >2-fold in the *retS* mutant relative to wt are shown.

| Gene Name        | <i>retS</i> /wt | <i>retSgacS</i> /wt | Description                                              |
|------------------|-----------------|---------------------|----------------------------------------------------------|
| PA1695_pscP_at   | 0.01            | 1.27                | translocation protein in type III secretion              |
| PA1707_pcrH_at   | 0.01            | 1.15                | regulatory protein PcrH                                  |
| PA0044_exoT_at   | 0.01            | 1.29                | exoenzyme T                                              |
| PA3843_at        | 0.01            | 1.28                | hypothetical protein                                     |
| PA2191_exoY_at   | 0.01            | 1.02                | adenylate cyclase ExoY                                   |
| PA3841_exoS_at   | 0.01            | 0.91                | exoenzyme S                                              |
| PA1706_pcrV_at   | 0.01            | 1.29                | type III secretion protein PcrV                          |
| PA3842_at        | 0.01            | 1.31                | probable chaperone                                       |
| PA2783_at        | 0.01            | 1.50                | hypothetical protein                                     |
| PA1708_popB_at   | 0.01            | 1.47                | translocator protein PopB                                |
| PA1699_at        | 0.01            | 1.72                | conserved hypothetical protein in type III secretion     |
| PA1709_popD_at   | 0.01            | 1.65                | Translocator outer membrane protein PopD precursor       |
| PA1693_pscR_at   | 0.02            | 1.29                | translocation protein in type III secretion              |
| PA1700_at        | 0.02            | 1.80                | conserved hypothetical protein in type III secretion     |
| PA1702_i_at      | 0.02            | 1.83                | conserved hypothetical protein in type III secretion     |
| PA1701_at        | 0.02            | 1.69                | conserved hypothetical protein in type III secretion     |
| PA1703_pcrD_at   | 0.02            | 1.54                | type III secretory apparatus protein PcrD                |
| PA2782_at        | 0.02            | 1.20                | hypothetical protein                                     |
| PA1715_pscB_at   | 0.03            | 1.52                | type III export apparatus protein                        |
| PA1696_pscO_at   | 0.03            | 1.53                | translocation protein in type III secretion              |
| PA1704_pcrR_at   | 0.03            | 1.81                | transcriptional regulator protein PcrR                   |
| PA1705_pcrG_i_at | 0.03            | 1.25                | regulator in type III secretion                          |
| PA1712_exsB_at   | 0.03            | 1.54                | exoenzyme S synthesis protein B                          |
| PA1719_pscF_at   | 0.03            | 1.12                | type III export protein PscF                             |
| PA1698_popN_at   | 0.03            | 1.85                | Type III secretion outer membrane protein PopN precursor |
| PA1721_pscH_at   | 0.03            | 1.29                | type III export protein PscH                             |
| PA1716_pscC_at   | 0.03            | 1.21                | Type III secretion outer membrane protein PscC precursor |
| PA1692_at        | 0.04            | 0.98                | probable translocation protein in type III secretion     |
| PA2258_ptxR_at   | 0.04            | 1.80                | transcriptional regulator PtxR                           |
| PA1691_pscT_at   | 0.04            | 1.08                | translocation protein in type III secretion              |
| PA1720_pscG_at   | 0.04            | 1.24                | type III export protein PscG                             |
| PA1722_pscI_at   | 0.04            | 1.83                | type III export protein PscI                             |
| PA1717_pscD_at   | 0.04            | 1.23                | type III export protein PscD                             |
| PA1723_pscJ_at   | 0.04            | 1.18                | type III export protein PscJ                             |
| PA1694_pscQ_at   | 0.04            | 1.17                | translocation protein in type III secretion              |
| PA1718_pscE_at   | 0.04            | 1.29                | type III export protein PscE                             |
| PA1711_at        | 0.04            | 1.73                | hypothetical protein                                     |
| PA0852_cpbD_at   | 0.05            | 1.45                | chitin-binding protein CbpD precursor                    |
| PA1710_exsC_at   | 0.05            | 1.18                | exoenzyme S synthesis protein C precursor                |
| PA2189_at        | 0.05            | 3.55                | hypothetical protein                                     |
| PA1714_at        | 0.05            | 1.37                | hypothetical protein                                     |
| PA1867_at        | 0.06            | 0.87                | hypothetical protein                                     |
| PA1183_dctA_at   | 0.06            | 0.97                | C4-dicarboxylate transport protein                       |
| PA1725_pscL_at   | 0.06            | 1.57                | type III export protein PscL                             |
| PA1697_at        | 0.06            | 1.78                | ATP synthase in type III secretion system                |
| PA4553_pilX_at   | 0.07            | 1.20                | type 4 fimbrial biogenesis protein PilX                  |
| PA1724_pscK_at   | 0.07            | 1.46                | type III export protein PscK                             |
| PA1713_exsA_at   | 0.07            | 1.63                | transcriptional regulator ExsA                           |

**Table S1. (continued)**

| <b>Gene Name</b>      | <b>retS/wt</b> | <b>retSgacS/wt</b> | <b>Description</b>                                     |
|-----------------------|----------------|--------------------|--------------------------------------------------------|
| PA2255_pvcB_at        | 0.07           | 0.63               | pyoverdine biosynthesis protein PvcB                   |
| PA1690_pscU_at        | 0.07           | 1.40               | translocation protein in type III secretion            |
| PA1868_xqhA_at        | 0.08           | 1.03               | secretion protein XqhA                                 |
| PA4555_pilY2_at       | 0.08           | 0.78               | type 4 fimbrial biogenesis protein PilY2               |
| PA0952_at             | 0.09           | 1.44               | hypothetical protein                                   |
| PA4554_pilY1_at       | 0.09           | 1.24               | type 4 fimbrial biogenesis protein PilY1               |
| PA4552_pilW_at        | 0.09           | 1.15               | type 4 fimbrial biogenesis protein PilW                |
| PA4556_pilE_at        | 0.09           | 0.75               | type 4 fimbrial biogenesis protein PilE                |
| PA4550_fimU_at        | 0.09           | 1.16               | type 4 fimbrial biogenesis protein FimU                |
| PA3091_at             | 0.10           | 1.52               | hypothetical protein                                   |
| PA1869_at             | 0.10           | 0.94               | probable acyl carrier protein                          |
| PA3840_at             | 0.11           | 2.21               | conserved hypothetical protein                         |
| PA4551_pilV_at        | 0.11           | 0.98               | type 4 fimbrial biogenesis protein PilV                |
| PA2784_at             | 0.12           | 1.75               | hypothetical protein                                   |
| PA0713_at             | 0.12           | 0.29               | hypothetical protein                                   |
| PA3278_at             | 0.14           | 0.78               | hypothetical protein                                   |
| PA4523_at             | 0.15           | 1.49               | hypothetical protein                                   |
| PA0396_pilU_at        | 0.17           | 0.97               | twitching motility protein PilU                        |
| PA4704_at             | 0.18           | 1.12               | hypothetical protein                                   |
| PA0359_at             | 0.18           | 1.38               | hypothetical protein                                   |
| PA4528_pilD_at        | 0.19           | 0.91               | type 4 prepilin peptidase PilD                         |
| PA0758_at             | 0.19           | 0.99               | hypothetical protein                                   |
| PA5043_pilN_at        | 0.19           | 1.69               | type 4 fimbrial biogenesis protein PilN                |
| PA5042_pilO_at        | 0.19           | 1.63               | type 4 fimbrial biogenesis protein PilO                |
| PA2179_at             | 0.19           | 0.31               | hypothetical protein                                   |
| PA0834_at             | 0.19           | 1.25               | conserved hypothetical protein                         |
| PA5041_pilP_at        | 0.19           | 1.25               | type 4 fimbrial biogenesis protein PilP                |
| PA0714_at             | 0.19           | 0.88               | hypothetical protein                                   |
| PA5122_at             | 0.20           | 1.43               | hypothetical protein                                   |
| PA5040_pilQ_at        | 0.21           | 1.10               | Type 4 fimbrial biogenesis outer membrane protein PilQ |
| ig_4326394_4327696_at | 0.21           | 1.02               |                                                        |
| PA1934_at             | 0.21           | 0.77               | hypothetical protein                                   |
| PA4771_lldD_at        | 0.22           | 0.56               | L-lactate dehydrogenase                                |
| PA4404_at             | 0.22           | 1.17               | hypothetical protein                                   |
| PA1525_at             | 0.22           | 1.06               | alkane-1-monooxygenase 2                               |
| PA0027_at             | 0.23           | 1.26               | hypothetical protein                                   |
| PA2785_at             | 0.23           | 1.30               | conserved hypothetical protein                         |
| PA0391_at             | 0.23           | 1.23               | hypothetical protein                                   |
| PA4979_at             | 0.23           | 1.23               | probable acyl-CoA dehydrogenase                        |
| PA5405_i_at           | 0.24           | 1.18               | hypothetical protein                                   |
| PA2873_at             | 0.24           | 0.79               | hypothetical protein                                   |
| PA5044_pilM_at        | 0.24           | 1.04               | type 4 fimbrial biogenesis protein PilM                |
| PA0602_at             | 0.24           | 0.80               | probable binding protein component of ABC transporter  |
| PA2436_at             | 0.24           | 0.88               | hypothetical protein                                   |
| PA2187_at             | 0.24           | 1.85               | hypothetical protein                                   |
| PA5404_at             | 0.25           | 1.46               | hypothetical protein                                   |
| PA3149_wbpH_at        | 0.25           | 1.27               | probable glycosyltransferase WbpH                      |
| PA2841_at             | 0.25           | 1.54               | probable enoyl-CoA hydratase/isomerase                 |
| PA1562_acnA_at        | 0.25           | 1.54               | aconitate hydratase 1                                  |
| PA4770_lldP_at        | 0.26           | 0.49               | L-lactate permease                                     |

**Table S1. (continued)**

| <b>Gene Name</b>      | <b>retS/wt</b> | <b>retSgacS/wt</b> | <b>Description</b>                                           |
|-----------------------|----------------|--------------------|--------------------------------------------------------------|
| PA5139_at             | 0.27           | 1.17               | hypothetical protein                                         |
| PA0395_pilT_at        | 0.27           | 1.29               | twitching motility protein PilT                              |
| PA1143_at             | 0.27           | 0.93               | hypothetical protein                                         |
| PA4682_at             | 0.28           | 1.07               | hypothetical protein                                         |
| PA3762_at             | 0.28           | 0.83               | hypothetical protein                                         |
| ig_5820909_5820113_at | 0.28           | 0.98               |                                                              |
| PA4369_at             | 0.29           | 1.13               | hypothetical protein                                         |
| PA3066_at             | 0.29           | 1.48               | hypothetical protein                                         |
| PA2178_at             | 0.29           | 0.73               | hypothetical protein                                         |
| PA3090_at             | 0.29           | 1.99               | hypothetical protein                                         |
| PA0026_at             | 0.30           | 1.25               | phospholipase C, PlcB                                        |
| PA3845_at             | 0.30           | 1.17               | probable transcriptional regulator                           |
| PA0028_at             | 0.30           | 1.09               | hypothetical protein                                         |
| PA4772_at             | 0.30           | 0.48               | probable ferredoxin                                          |
| PA2054_cynR_at        | 0.30           | 1.21               | transcriptional regulator CynR                               |
| PA4390_at             | 0.30           | 1.89               | hypothetical protein                                         |
| PA2874_at             | 0.30           | 0.93               | hypothetical protein                                         |
| PA2350_at             | 0.30           | 1.65               | probable ATP-binding component of ABC transporter            |
| PA0135_at             | 0.30           | 0.97               | hypothetical protein                                         |
| PA1036_at             | 0.30           | 0.81               | hypothetical protein                                         |
| PA5543_at             | 0.31           | 0.67               | hypothetical protein                                         |
| PA5210_at             | 0.31           | 1.79               | probable secretion pathway ATPase                            |
| PA0020_at             | 0.31           | 1.11               | hypothetical protein                                         |
| PA5262_algZ_at        | 0.31           | 1.04               | alginate biosynthesis protein AlgZ/FimS                      |
| PA3097_xcpX_at        | 0.31           | 0.82               | general secretion pathway protein K                          |
| PA2346_at             | 0.31           | 1.71               | conserved hypothetical protein                               |
| PA4616_at             | 0.32           | 1.68               | probable c4-dicarboxylate-binding protein                    |
| PA2559_at             | 0.32           | 1.21               | hypothetical protein                                         |
| PA2761_at             | 0.32           | 0.67               | hypothetical protein                                         |
| PA5472_at             | 0.32           | 0.90               | hypothetical protein                                         |
| PA3956_at             | 0.32           | 0.93               | hypothetical protein                                         |
| PA3844_at             | 0.32           | 1.58               | hypothetical protein                                         |
| PA0645_at             | 0.32           | 0.34               | hypothetical protein                                         |
| PA1825_at             | 0.33           | 0.69               | hypothetical protein                                         |
| PA3100_xcpU_at        | 0.33           | 1.75               | General secretion pathway outer membrane protein H           |
| ig_5774806_5775619_at | 0.33           | 1.24               |                                                              |
| ig_3129728_3129070_at | 0.33           | 0.84               |                                                              |
| PA2824_at             | 0.33           | 1.27               | probable sensor/response regulator hybrid                    |
| PA5167_at             | 0.33           | 0.50               | probable c4-dicarboxylate-binding protein                    |
| PA0410_pilI_at        | 0.34           | 1.74               | twitching motility protein PilI                              |
| PA0882_at             | 0.34           | 1.39               | hypothetical protein                                         |
| PA0413_at             | 0.34           | 0.97               | probable component of chemotactic signal transduction system |
| PA2412_at             | 0.35           | 9.95               | conserved hypothetical protein                               |
| PA1133_at             | 0.35           | 1.02               | hypothetical protein                                         |
| PA2044_at             | 0.35           | 1.23               | hypothetical protein                                         |
| PA3578_at             | 0.36           | 1.45               | conserved hypothetical protein                               |
| PA1894_at             | 0.36           | 0.95               | hypothetical protein                                         |
| PA0720_at             | 0.36           | 1.46               | helix destabilizing protein of bacteriophage Pf1             |
| PA0406_at             | 0.36           | 1.12               | hypothetical protein                                         |
| PA3099_xcpV_at        | 0.36           | 1.12               | general secretion pathway protein I                          |

**Table S1. (continued)**

| <b>Gene Name</b>      | <b>retS/wt</b> | <b>retSgacS/wt</b> | <b>Description</b>                                 |
|-----------------------|----------------|--------------------|----------------------------------------------------|
| PA4697_at             | 0.36           | 0.63               | hypothetical protein                               |
| PA5363_at             | 0.37           | 1.46               | hypothetical protein                               |
| PA4546_pilS_at        | 0.37           | 0.82               | two-component sensor PilS                          |
| PA4179_at             | 0.37           | 1.25               | probable porin                                     |
| PA5123_at             | 0.37           | 1.36               | hypothetical protein                               |
| PA4856_at             | 0.37           | 0.36               | RtsM                                               |
| PA2990_at             | 0.37           | 1.80               | probable phosphodiesterase                         |
| PA2676_at             | 0.37           | 0.55               | probable type II secretion system protein          |
| PA0414_at             | 0.37           | 1.16               | probable methyltransferase                         |
| ig_2281578_2282480_at | 0.37           | 2.15               | probable transcriptional regulator                 |
| PA5545_at             | 0.37           | 0.67               | conserved hypothetical protein                     |
| PA4108_at             | 0.38           | 1.12               | hypothetical protein                               |
| PA1216_at             | 0.38           | 1.89               | hypothetical protein                               |
| PA4526_pilB_at        | 0.38           | 1.25               | type 4 fimbrial biogenesis protein PilB            |
| PA5402_at             | 0.38           | 2.05               | hypothetical protein                               |
| PA2458_at             | 0.38           | 0.89               | hypothetical protein                               |
| PA2875_at             | 0.38           | 1.25               | conserved hypothetical protein                     |
| PA2181_at             | 0.38           | 2.29               | hypothetical protein                               |
| PA5295_at             | 0.38           | 1.10               | hypothetical protein                               |
| PA4092_hpaC_at        | 0.39           | 1.94               | 4-hydroxyphenylacetate 3-monooxygenase small chain |
| PA2002_at             | 0.39           | 0.27               | conserved hypothetical protein                     |
| PA5116_at             | 0.39           | 1.16               | probable transcriptional regulator                 |
| PA2983_at             | 0.39           | 0.91               | probable tolQ-type transport protein               |
| PA3546_algX_at        | 0.40           | 1.34               | alginate biosynthesis protein AlgX                 |
| PA1506_at             | 0.40           | 0.82               | hypothetical protein                               |
| PA0449_at             | 0.40           | 1.21               | hypothetical protein                               |
| PA4547_pilR_at        | 0.41           | 1.54               | two-component response regulator PilR              |
| PA4396_at             | 0.41           | 1.32               | probable two-component response regulator          |
| PA0664_at             | 0.41           | 0.80               | hypothetical protein                               |
| PA2937_at             | 0.42           | 0.70               | hypothetical protein                               |
| PA0572_at             | 0.42           | 1.58               | hypothetical protein                               |
| PA5039_aroK_at        | 0.42           | 1.67               | shikimate kinase                                   |
| PA3098_xcpW_at        | 0.42           | 1.45               | general secretion pathway protein J                |
| PA2453_at             | 0.42           | 0.68               | hypothetical protein                               |
| PA0411_pilJ_at        | 0.43           | 1.12               | twitching motility protein PilJ                    |
| PA4073_at             | 0.43           | 1.33               | probable aldehyde dehydrogenase                    |
| PA1595_at             | 0.43           | 1.59               | hypothetical protein                               |
| PA0346_at             | 0.43           | 1.36               | hypothetical protein                               |
| PA0408_pilG_at        | 0.43           | 1.11               | twitching motility protein PilG                    |
| PA2981_lpxK_at        | 0.44           | 1.05               | tetraacyldisaccharide 4*-kinase                    |
| PA2959_at             | 0.44           | 1.14               | conserved hypothetical protein                     |
| PA2434_at             | 0.44           | 1.27               | hypothetical protein                               |
| PA4397_panE_at        | 0.45           | 1.28               | ketopantoate reductase                             |
| ig_5992382_5991130_at | 0.45           | 1.24               |                                                    |
| PA3102_xcpS_at        | 0.45           | 1.56               | general secretion pathway protein F                |
| PA1148_toxA_at        | 0.45           | 1.46               | exotoxin A precursor                               |
| ig_5563964_5563286_at | 0.45           | 1.36               |                                                    |
| PA2872_at             | 0.45           | 0.84               | hypothetical protein                               |
| PA2960_pilZ_at        | 0.46           | 0.95               | type 4 fimbrial biogenesis protein PilZ            |
| PA0538_dsbB_at        | 0.46           | 1.02               | disulfide bond formation protein                   |

**Table S1. (continued)**

| <b>Gene Name</b>    | <b>retS/wt</b> | <b>retSgacS/wt</b> | <b>Description</b>                                           |
|---------------------|----------------|--------------------|--------------------------------------------------------------|
| PA4677_at           | 0.46           | 2.07               | hypothetical protein                                         |
| PA5530_at           | 0.46           | 0.42               | probable MFS dicarboxylate transporter                       |
| PA3115_at           | 0.46           | 1.59               | Motility protein FimV                                        |
| PA2786_at           | 0.46           | 2.23               | hypothetical protein                                         |
| PA3101_xcpT_at      | 0.46           | 1.16               | general secretion pathway protein G                          |
| PA0663_at           | 0.46           | 1.39               | hypothetical protein                                         |
| PA3096_xcpY_at      | 0.46           | 0.93               | general secretion pathway protein L                          |
| PA4837_at           | 0.47           | 1.26               | probable outer membrane protein precursor                    |
| PA0295_at           | 0.47           | 1.20               | probable periplasmic polyamine binding protein               |
| PA4325_at           | 0.48           | 1.00               | hypothetical protein                                         |
| PA5261_algR_at      | 0.48           | 1.21               | alginate biosynthesis regulatory protein AlgR                |
| PA0415_at           | 0.48           | 0.99               | probable chemotaxis protein                                  |
| PA4530_at           | 0.49           | 0.99               | conserved hypothetical protein                               |
| PA2028_at           | 0.49           | 0.77               | probable transcriptional regulator                           |
| PA1191_at           | 0.49           | 0.62               | hypothetical protein                                         |
| PA1419_at           | 0.49           | 0.85               | probable transporter                                         |
| PA2674_at           | 0.50           | 1.08               | probable type II secretion system protein                    |
| PA0416_at           | 0.50           | 1.12               | probable transcriptional regulator                           |
| PA0409_pilH_at      | 0.50           | 1.08               | twitching motility protein PilH                              |
| PA2386_pvdA_at      | 0.50           | 2.58               | L-ornithine N5-oxygenase                                     |
| PA4166_at           | 2.02           | 0.89               | probable acetyltransferase                                   |
| PA3496_at           | 2.02           | 1.65               | hypothetical protein                                         |
| PA0869_pbpG_at      | 2.03           | 0.62               | D-alanyl-D-alanine-endopeptidase                             |
| PA4331_at           | 2.03           | 0.98               | probable ferredoxin reductase                                |
| PA4614_mscl_at      | 2.03           | 0.46               | conductance mechanosensitive channel                         |
| PA0855_at           | 2.04           | 0.89               | hypothetical protein                                         |
| PA3427_at           | 2.05           | 0.11               | probable short-chain dehydrogenases                          |
| PA2432_at           | 2.07           | 0.88               | probable transcriptional regulator                           |
| PA1197_at           | 2.07           | 1.25               | hypothetical protein                                         |
| PA3334_at           | 2.09           | 1.23               | probable acyl carrier protein                                |
| PA2917_at           | 2.09           | 0.87               | probable transcriptional regulator                           |
| PA3919_at           | 2.10           | 0.91               | conserved hypothetical protein                               |
| PA2062_at           | 2.10           | 0.69               | probable pyridoxal-phosphate dependent enzyme                |
| PA3189_at           | 2.12           | 0.17               | probable permease of ABC sugar transporter                   |
| PA5390_at           | 2.13           | 3.01               | probable peptidic bond hydrolase                             |
| PA3293_at           | 2.13           | 1.50               | hypothetical protein                                         |
| PA0938_at           | 2.13           | 2.03               | hypothetical protein                                         |
| PA0333_at           | 2.14           | 1.29               | hypothetical protein                                         |
| PA2867_at           | 2.16           | 0.62               | probable chemotaxis transducer                               |
| PA0013_at           | 2.17           | 1.99               | conserved hypothetical protein                               |
| PA5369_at           | 2.18           | 1.30               | hypothetical protein                                         |
| PA4201_ddIA_at      | 2.19           | 1.89               | D-alanine-D-alanine ligase A                                 |
| ig_517462_518083_at | 2.19           | 0.11               | probable ClpA/B protease ATP binding subunit                 |
| PA1806_fabI_at      | 2.19           | 0.80               | NADH-dependent enoyl-ACP reductase                           |
| PA3939_at           | 2.19           | 0.35               | hypothetical protein                                         |
| PA1567_at           | 2.19           | 5.52               | conserved hypothetical protein                               |
| PA3662_at           | 2.20           | 0.57               | hypothetical protein                                         |
| PA2355_at           | 2.21           | 1.10               | probable FMNH2-dependent monooxygenase                       |
| PA4375_at           | 2.22           | 2.82               | Resistance-Nodulation-Cell Division (RND) efflux transporter |
| PA4632_at           | 2.24           | 1.05               | hypothetical protein                                         |

**Table S1. (continued)**

| <b>Gene Name</b>      | <b>retS/wt</b> | <b>retSgacS/wt</b> | <b>Description</b>                                    |
|-----------------------|----------------|--------------------|-------------------------------------------------------|
| PA0537_at             | 2.26           | 0.86               | conserved hypothetical protein                        |
| PA4352_at             | 2.28           | 0.76               | conserved hypothetical protein                        |
| PA2358_at             | 2.28           | 0.41               | hypothetical protein                                  |
| PA0284_at             | 2.28           | 0.58               | hypothetical protein                                  |
| PA0211_mdcD_at        | 2.29           | 1.62               | malonate decarboxylase beta subunit                   |
| PA1544_anr_at         | 2.29           | 0.93               | transcriptional regulator Anr                         |
| PA5381_at             | 2.30           | 3.17               | hypothetical protein                                  |
| PA0659_at             | 2.31           | 0.85               | hypothetical protein                                  |
| PA3450_at             | 2.31           | 0.37               | probable antioxidant protein                          |
| PA2916_at             | 2.32           | 0.50               | hypothetical protein                                  |
| PA2503_at             | 2.33           | 1.15               | hypothetical protein                                  |
| PA1746_at             | 2.34           | 1.30               | hypothetical protein                                  |
| PA2370_at             | 2.35           | 5.11               | hypothetical protein                                  |
| PA3536_at             | 2.36           | 1.20               | hypothetical protein                                  |
| PA1789_at             | 2.41           | 0.09               | hypothetical protein                                  |
| PA5461_at             | 2.41           | 0.56               | hypothetical protein                                  |
| PA2753_at             | 2.42           | 0.55               | hypothetical protein                                  |
| PA0064_at             | 2.42           | 1.36               | hypothetical protein                                  |
| PA2772_at             | 2.43           | 1.40               | hypothetical protein                                  |
| PA5412_at             | 2.44           | 0.73               | hypothetical protein                                  |
| ig_2894451_2893827_at | 2.44           | 0.73               | hypothetical protein                                  |
| PA2723_at             | 2.45           | 0.64               | hypothetical protein                                  |
| PA0039_at             | 2.46           | 0.97               | hypothetical protein                                  |
| PA5171_arcA_at        | 2.46           | 0.36               | arginine deiminase                                    |
| PA3141_wbpM_g_at      | 2.47           | 1.36               | nucleotide sugar epimerase/dehydratase WbpM           |
| PA3793_at             | 2.49           | 0.85               | hypothetical protein                                  |
| PA0829_at             | 2.50           | 3.83               | probable hydrolase                                    |
| PA2727_at             | 2.51           | 0.82               | hypothetical protein                                  |
| PA2592_at             | 2.51           | 0.87               | periplasmic spermidine/putrescine-binding protein     |
| PA3317_at             | 2.51           | 1.16               | hypothetical protein                                  |
| PA2720_at             | 2.51           | 0.82               | hypothetical protein                                  |
| PA2380_at             | 2.52           | 0.71               | hypothetical protein                                  |
| PA1940_at             | 2.53           | 0.87               | hypothetical protein                                  |
| PA5375_betT1_at       | 2.54           | 5.00               | choline transporter BetT                              |
| PA3911_at             | 2.55           | 1.34               | conserved hypothetical protein                        |
| PA1659_at             | 2.57           | 0.33               | hypothetical protein                                  |
| PA1557_at             | 2.57           | 0.31               | probable cytochrome oxidase subunit (cbb3-type)       |
| PA1494_at             | 2.59           | 1.01               | conserved hypothetical protein                        |
| PA2238_at             | 2.59           | 0.68               | hypothetical protein                                  |
| PA5290_at             | 2.59           | 1.16               | conserved hypothetical protein                        |
| PA3933_at             | 2.60           | 3.78               | probable choline transporter                          |
| PA5120_at             | 2.61           | 1.41               | hypothetical protein                                  |
| PA1414_at             | 2.62           | 0.16               | hypothetical protein                                  |
| PA1555_at             | 2.62           | 0.41               | probable cytochrome c                                 |
| PA4059_at             | 2.63           | 1.10               | hypothetical protein                                  |
| PA0806_i_at           | 2.64           | 1.04               | hypothetical protein                                  |
| PA1171_at             | 2.66           | 1.16               | probable transglycolase                               |
| PA0050_r_at           | 2.66           | 0.99               | hypothetical protein                                  |
| PA3294_s_at           | 2.68           | 1.73               | hypothetical protein ; conserved hypothetical protein |
| PA5475_at             | 2.72           | 0.57               | hypothetical protein                                  |

**Table S1. (continued)**

| <b>Gene Name</b> | <b>retS/wt</b> | <b>retSgacS/wt</b> | <b>Description</b>                                    |
|------------------|----------------|--------------------|-------------------------------------------------------|
| PA4995_at        | 2.73           | 0.58               | probable acyl-CoA dehydrogenase                       |
| PA4032_at        | 2.74           | 1.28               | probable two-component response regulator             |
| PA3922_at        | 2.76           | 1.11               | conserved hypothetical protein                        |
| PA3058_at        | 2.77           | 1.46               | hypothetical protein                                  |
| PA0527_dnr_at    | 2.77           | 0.68               | transcriptional regulator Dnr                         |
| PA2496_at        | 2.82           | 1.22               | hypothetical protein                                  |
| PA3483_at        | 2.83           | 1.08               | hypothetical protein                                  |
| PA4323_at        | 2.84           | 0.85               | hypothetical protein                                  |
| PA4321_at        | 2.84           | 0.74               | hypothetical protein                                  |
| PA0749_at        | 2.84           | 0.94               | hypothetical protein                                  |
| PA3446_at        | 2.85           | 0.27               | conserved hypothetical protein                        |
| PA2501_at        | 2.85           | 0.55               | hypothetical protein                                  |
| PA4111_i_at      | 2.87           | 1.11               | hypothetical protein                                  |
| PA1377_at        | 2.87           | 1.11               | conserved hypothetical protein                        |
| PA4119_aph_at    | 2.88           | 1.68               | aminoglycoside 3'-phosphotransferase type IIb         |
| PA5025_metY_at   | 2.90           | 1.21               | homocysteine synthase                                 |
| PA1913_at        | 2.91           | 0.93               | hypothetical protein                                  |
| PA3931_at        | 2.96           | 0.41               | conserved hypothetical protein                        |
| PA1451_at        | 2.96           | 1.52               | conserved hypothetical protein                        |
| PA1378_at        | 2.97           | 1.24               | hypothetical protein                                  |
| PA0092_at        | 2.97           | 1.16               | hypothetical protein                                  |
| PA0081_at        | 2.99           | 1.32               | hypothetical protein                                  |
| PA5033_at        | 2.99           | 1.65               | hypothetical protein                                  |
| PA0052_at        | 3.04           | 0.64               | hypothetical protein                                  |
| PA3063_at        | 3.05           | 1.28               | hypothetical protein                                  |
| PA0867_at        | 3.10           | 0.87               | hypothetical protein                                  |
| PA4611_at        | 3.13           | 0.79               | hypothetical protein                                  |
| PA1556_at        | 3.16           | 0.43               | probable cytochrome c oxidase subunit                 |
| PA1941_at        | 3.17           | 1.31               | hypothetical protein                                  |
| PA3732_at        | 3.19           | 1.12               | conserved hypothetical protein                        |
| PA4495_at        | 3.21           | 0.75               | hypothetical protein                                  |
| PA2204_at        | 3.21           | 0.41               | probable binding protein component of ABC transporter |
| PA2567_at        | 3.22           | 0.77               | hypothetical protein                                  |
| PA0201_at        | 3.24           | 0.20               | hypothetical protein                                  |
| PA0706_cat_at    | 3.26           | 0.98               | chloramphenicol acetyltransferase                     |
| PA4034_aqpZ_at   | 3.27           | 0.36               | aquaporin Z                                           |
| PA0320_at        | 3.28           | 0.70               | conserved hypothetical protein                        |
| PA2425_at        | 3.28           | 3.15               | PvdG                                                  |
| PA5427_adhA_at   | 3.31           | 0.34               | alcohol dehydrogenase                                 |
| PA4320_at        | 3.34           | 1.21               | hypothetical protein                                  |
| PA4328_at        | 3.37           | 1.54               | hypothetical protein                                  |
| PA3572_at        | 3.38           | 0.39               | hypothetical protein                                  |
| PA3731_at        | 3.46           | 1.55               | conserved hypothetical protein                        |
| PA1196_at        | 3.48           | 0.65               | probable transcriptional regulator                    |
| PA1727_at        | 3.49           | 1.40               | conserved hypothetical protein                        |
| PA1202_at        | 3.50           | 0.66               | probable hydrolase                                    |
| PA2683_at        | 3.51           | 0.60               | probable serine/threonine dehydratase, degradative    |
| PA2833_i_at      | 3.52           | 0.45               | conserved hypothetical protein                        |
| PA5170_arcD_at   | 3.52           | 0.09               | arginine/ornithine antiporter                         |
| PA2440_at        | 3.59           | 1.18               | hypothetical protein                                  |

**Table S1. (continued)**

| <b>Gene Name</b>      | <b>retS/wt</b> | <b>retSgacS/wt</b> | <b>Description</b>                                    |
|-----------------------|----------------|--------------------|-------------------------------------------------------|
| PA4518_at             | 3.60           | 0.89               | hypothetical protein                                  |
| PA3794_at             | 3.62           | 0.86               | hypothetical protein                                  |
| PA1432_lasl_at        | 3.66           | 1.12               | autoinducer synthesis protein LasI                    |
| PA1657_at             | 3.70           | 0.70               | conserved hypothetical protein                        |
| PA2560_at             | 3.73           | 1.24               | hypothetical protein                                  |
| PA1645_at             | 3.73           | 1.18               | hypothetical protein                                  |
| PA1673_at             | 3.75           | 0.85               | hypothetical protein                                  |
| PA5112_estA_at        | 3.81           | 0.78               | esterase EstA                                         |
| PA0736_at             | 3.86           | 1.36               | hypothetical protein                                  |
| PA4571_at             | 3.87           | 1.11               | probable cytochrome c                                 |
| PA0095_at             | 3.93           | 1.40               | conserved hypothetical protein                        |
| PA2240_at             | 3.95           | 1.22               | hypothetical protein                                  |
| PA3188_at             | 3.96           | 0.17               | probable permease of ABC sugar transporter            |
| PA4651_at             | 3.97           | 1.03               | probable pili assembly chaperone                      |
| PA4577_at             | 3.97           | 0.59               | hypothetical protein                                  |
| PA3309_at             | 3.99           | 0.25               | conserved hypothetical protein                        |
| PA3337_rfaD_at        | 4.00           | 0.40               | ADP-L-glycero-D-mannoheptose 6-epimerase              |
| PA4319_at             | 4.03           | 1.06               | conserved hypothetical protein                        |
| PA1126_at             | 4.05           | 0.81               | hypothetical protein                                  |
| PA0730_at             | 4.05           | 0.93               | probable transferase                                  |
| PA1068_at             | 4.06           | 1.23               | probable heat shock protein (hsp90 family)            |
| PA0042_at             | 4.16           | 1.09               | hypothetical protein                                  |
| ig_1348401_1349416_at | 4.17           | 9.17               | hypothetical protein                                  |
| PA0200_i_at           | 4.17           | 0.09               | hypothetical protein                                  |
| PA2517_xylY_at        | 4.20           | 4.04               | toluate 1,2-dioxygenase beta subunit                  |
| PA0735_at             | 4.23           | 1.04               | hypothetical protein                                  |
| PA2231_at             | 4.30           | 1.14               | probable glycosyl transferase                         |
| PA0040_s_at           | 4.31           | 1.67               | conserved hypothetical protein ; hypothetical protein |
| PA1132_at             | 4.41           | 0.64               | hypothetical protein                                  |
| PA4830_at             | 4.42           | 4.59               | hypothetical protein                                  |
| PA2242_at             | 4.49           | 0.90               | hypothetical protein                                  |
| PA1450_at             | 4.50           | 1.18               | conserved hypothetical protein                        |
| PA2239_at             | 4.51           | 1.24               | probable transferase                                  |
| PA4800_at             | 4.55           | 1.26               | hypothetical protein                                  |
| PA4801_at             | 4.55           | 0.84               | hypothetical protein                                  |
| PA2685_at             | 4.56           | 1.14               | conserved hypothetical protein                        |
| PA3340_at             | 4.57           | 0.77               | hypothetical protein                                  |
| PA4058_at             | 4.73           | 2.26               | hypothetical protein                                  |
| PA2541_at             | 4.78           | 0.78               | probable CDP-alcohol phosphatidyltransferase          |
| PA1791_at             | 4.80           | 1.76               | hypothetical protein                                  |
| PA2775_at             | 4.82           | 0.99               | hypothetical protein ; tRNA-Val                       |
| PA2450_at             | 4.84           | 1.55               | hypothetical protein                                  |
| PA4322_at             | 4.84           | 1.24               | conserved hypothetical protein                        |
| PA4318_at             | 4.87           | 0.99               | hypothetical protein                                  |
| PA3730_at             | 4.90           | 1.17               | hypothetical protein                                  |
| PA0172_at             | 4.91           | 1.15               | hypothetical protein                                  |
| PA1667_at             | 4.94           | 0.51               | hypothetical protein                                  |
| PA4492_at             | 5.32           | 1.09               | conserved hypothetical protein                        |
| PA4488_at             | 5.47           | 0.70               | conserved hypothetical protein                        |
| PA2789_at             | 5.50           | 1.47               | hypothetical protein                                  |



**Table S1. (continued)**

| <b>Gene Name</b>      | <b>retS/wt</b> | <b>retSgacS/wt</b> | <b>Description</b>                                       |
|-----------------------|----------------|--------------------|----------------------------------------------------------|
| PA4487_at             | 5.59           | 0.83               | conserved hypothetical protein                           |
| ig_2918211_2918966_at | 5.64           | 1.95               |                                                          |
| PA4491_at             | 5.74           | 0.70               | conserved hypothetical protein                           |
| PA2536_at             | 5.76           | 1.10               | probable phosphatidate cytidyltransferase                |
| PA0886_at             | 5.78           | 3.07               | probable C4-dicarboxylate transporter                    |
| PA2441_at             | 5.79           | 1.54               | hypothetical protein                                     |
| PA1236_at             | 5.85           | 2.64               | probable major facilitator superfamily (MFS) transporter |
| PA2232_at             | 5.95           | 0.99               | P-mannose isomerase/GDP-mannose pyrophosphorylase        |
| PA2423_at             | 5.96           | 1.21               | hypothetical protein                                     |
| PA5136_at             | 6.13           | 1.44               | hypothetical protein                                     |
| ig_3545880_3545073_at | 6.32           | 1.88               | O-antigen chain length regulator                         |
| PA4489_at             | 6.38           | 1.22               | conserved hypothetical protein                           |
| PA4490_at             | 6.39           | 1.11               | conserved hypothetical protein                           |
| PA0097_at             | 6.50           | 1.25               | hypothetical protein                                     |
| PA2774_at             | 6.50           | 1.09               | hypothetical protein                                     |
| PA2237_at             | 6.55           | 0.85               | probable glycosyl hydrolase                              |
| PA2537_at             | 6.68           | 0.61               | probable acyltransferase                                 |
| PA3715_at             | 6.73           | 2.20               | hypothetical protein                                     |
| PA2233_at             | 6.77           | 1.69               | probable glycosyl transferase                            |
| PA2236_at             | 6.92           | 1.22               | hypothetical protein                                     |
| PA4317_at             | 6.99           | 0.91               | hypothetical protein                                     |
| PA3727_at             | 7.03           | 1.65               | hypothetical protein                                     |
| PA2684_at             | 7.10           | 1.01               | conserved hypothetical protein                           |
| PA1396_at             | 7.16           | 0.64               | probable two-component sensor                            |
| PA0170_at             | 7.18           | 0.88               | hypothetical protein                                     |
| PA2235_at             | 7.27           | 0.82               | hypothetical protein                                     |
| PA2464_at             | 7.27           | 0.82               | hypothetical protein                                     |
| PA0072_at             | 7.39           | 1.13               | hypothetical protein                                     |
| PA3729_at             | 7.48           | 0.95               | conserved hypothetical protein                           |
| PA4033_at             | 7.70           | 0.93               | hypothetical protein                                     |
| PA2538_at             | 7.76           | 0.95               | hypothetical protein                                     |
| PA3061_at             | 7.88           | 0.75               | hypothetical protein                                     |
| PA3484_at             | 8.28           | 0.90               | hypothetical protein                                     |
| PA3728_at             | 8.39           | 1.15               | hypothetical protein                                     |
| PA0820_at             | 8.46           | 1.73               | hypothetical protein                                     |
| PA1069_at             | 8.58           | 1.03               | hypothetical protein                                     |
| PA2234_at             | 8.61           | 1.11               | probable exopolysaccharide transporter                   |
| PA5113_at             | 8.72           | 0.74               | hypothetical protein                                     |
| PA0094_at             | 8.77           | 0.73               | hypothetical protein                                     |
| PA0074_ppkA_at        | 8.86           | 1.22               | serine/threonine protein kinase PpkA                     |
| PA5361_phoR_at        | 8.88           | 2.89               | two-component sensor PhoR                                |
| ig_6125795_6125079_at | 9.13           | 1.09               | hypothetical protein                                     |
| PA5441_at             | 9.16           | 1.45               | hypothetical protein                                     |
| PA0093_at             | 9.31           | 1.73               | hypothetical protein                                     |
| PA3850_at             | 9.34           | 1.17               | hypothetical protein                                     |
| PA0073_at             | 9.38           | 0.77               | probable ATP-binding component of ABC transporter        |
| PA2581_at             | 9.65           | 1.72               | hypothetical protein ; tRNA-Cys                          |
| PA2702_at             | 9.78           | 0.96               | hypothetical protein                                     |
| PA3021_at             | 10.00          | 1.07               | hypothetical protein                                     |
| PA2703_at             | 10.26          | 0.74               | hypothetical protein                                     |

**Table S1. (continued)**

| <b>Gene Name</b>      | <b>retS/wt</b> | <b>retSgacS/wt</b> | <b>Description</b>                  |
|-----------------------|----------------|--------------------|-------------------------------------|
| PA0076_at             | 10.26          | 0.98               | hypothetical protein                |
| PA3716_at             | 10.66          | 1.02               | hypothetical protein                |
| PA3064_at             | 10.96          | 3.55               | hypothetical protein                |
| PA3619_at             | 11.01          | 1.57               | hypothetical protein                |
| PA4624_at             | 11.20          | 1.19               | hypothetical protein                |
| PA3722_at             | 11.20          | 1.06               | hypothetical protein                |
| PA0071_at             | 11.27          | 1.33               | hypothetical protein                |
| PA4625_at             | 11.70          | 1.73               | hypothetical protein                |
| PA0563_at             | 12.05          | 0.78               | conserved hypothetical protein      |
| PA0079_at             | 12.22          | 0.95               | hypothetical protein                |
| PA2793_at             | 12.56          | 1.69               | hypothetical protein                |
| PA0171_at             | 12.79          | 1.42               | hypothetical protein                |
| PA1844_at             | 13.39          | 2.21               | hypothetical protein                |
| PA0169_at             | 14.13          | 1.32               | hypothetical protein                |
| PA2540_at             | 14.46          | 1.09               | conserved hypothetical protein      |
| PA0080_at             | 14.69          | 1.01               | hypothetical protein                |
| PA1672_at             | 14.74          | 5.56               | hypothetical protein                |
| PA2792_at             | 14.81          | 1.76               | hypothetical protein                |
| PA0070_at             | 15.01          | 1.05               | hypothetical protein                |
| PA0077_at             | 15.15          | 0.91               | hypothetical protein                |
| PA1845_at             | 15.36          | 1.30               | hypothetical protein                |
| PA1394_at             | 15.42          | 0.74               | hypothetical protein                |
| PA0075_at             | 15.60          | 1.30               | probable phosphoprotein phosphatase |
| PA3485_r_at           | 16.09          | 1.48               | hypothetical protein                |
| PA0088_at             | 16.39          | 1.05               | hypothetical protein                |
| PA0989_at             | 20.01          | 1.33               | hypothetical protein                |
| PA0082_at             | 20.44          | 0.96               | hypothetical protein                |
| ig_6125079_6125795_at | 22.48          | 1.64               |                                     |
| PA0078_at             | 22.92          | 1.63               | hypothetical protein                |
| PA5114_at             | 22.93          | 0.76               | hypothetical protein                |
| PA2539_at             | 22.99          | 1.67               | conserved hypothetical protein      |
| PA2205_at             | 23.11          | 0.62               | hypothetical protein                |
| PA3060_at             | 23.39          | 1.21               | hypothetical protein                |
| PA1395_at             | 27.56          | 0.57               | hypothetical protein                |
| PA0126_at             | 28.38          | 1.35               | hypothetical protein                |
| PA0091_at             | 31.64          | 2.32               | conserved hypothetical protein      |
| PA0086_at             | 36.83          | 1.22               | hypothetical protein                |
| PA0084_at             | 39.13          | 0.98               | conserved hypothetical protein      |
| PA0087_at             | 39.26          | 1.05               | hypothetical protein                |
| PA0083_at             | 49.62          | 1.00               | conserved hypothetical protein      |
| PA0090_at             | 57.20          | 1.61               | probable ClpA/B-type chaperone      |
| PA0277_at             | 59.87          | 2.08               | conserved hypothetical protein      |
| PA0089_at             | 72.35          | 0.62               | hypothetical protein                |
| PA0085_at             | 113.80         | 1.76               | conserved hypothetical protein      |
| PA3661_at             | 444.40         | 0.40               | hypothetical protein                |

**Table S2. Genes whose expression changed >2x relative to wild type in at least one of the mutant strains.**

| <b>Gene name</b>      | <b><i>gacA</i>/wt</b> | <b><i>rsmYZ</i>/wt</b> | <b>Description</b>                                       |
|-----------------------|-----------------------|------------------------|----------------------------------------------------------|
| ig_2164548_2165213_at | 10.0                  | 9.1                    |                                                          |
| ig_2918211_2918966_at | 0.5                   | 0.3                    |                                                          |
| PA0007_at             | 0.5                   | 0.2                    | hypothetical protein                                     |
| PA0044_exoT_at        | 4.2                   | 4.5                    | exoenzyme T                                              |
| PA0046_at             | 0.4                   | 0.3                    | hypothetical protein                                     |
| PA0047_at             | 0.3                   | 0.4                    | hypothetical protein                                     |
| PA0050_r_at           | 0.5                   | 0.5                    | hypothetical protein                                     |
| PA0070_at             | 0.2                   | 0.2                    | hypothetical protein                                     |
| PA0075_at             | 0.5                   | 0.5                    | probable phosphoprotein phosphatase                      |
| PA0076_at             | 0.6                   | 0.5                    | hypothetical protein                                     |
| PA0079_at             | 0.5                   | 0.3                    | hypothetical protein                                     |
| PA0082_at             | 0.4                   | 0.4                    | hypothetical protein                                     |
| PA0083_at             | 0.1                   | 0.1                    | conserved hypothetical protein                           |
| PA0084_at             | 0.2                   | 0.2                    | conserved hypothetical protein                           |
| PA0085_at             | 0.1                   | 0.1                    | conserved hypothetical protein                           |
| PA0090_at             | 0.2                   | 0.4                    | probable ClpA/B-type chaperone                           |
| PA0092_at             | 0.5                   | 0.6                    | hypothetical protein                                     |
| PA0093_at             | 0.3                   | 0.6                    | hypothetical protein                                     |
| PA0094_at             | 0.5                   | 0.5                    | hypothetical protein                                     |
| PA0122_at             | 0.5                   | 0.5                    | conserved hypothetical protein                           |
| PA0169_at             | 0.3                   | 0.2                    | hypothetical protein                                     |
| PA0170_at             | 0.3                   | 0.3                    | hypothetical protein                                     |
| PA0171_at             | 0.2                   | 0.2                    | hypothetical protein                                     |
| PA0208_mdcA_at        | 0.7                   | 0.5                    | malonate decarboxylase alpha subunit                     |
| PA0209_at             | 0.8                   | 0.4                    | conserved hypothetical protein                           |
| PA0211_mdcD_at        | 0.8                   | 0.5                    | malonate decarboxylase beta subunit                      |
| PA0333_at             | 0.4                   | 0.6                    | hypothetical protein                                     |
| PA0347_glpQ_at        | 1.2                   | 2.5                    | glycerophosphoryl diester phosphodiesterase, periplasmic |
| PA0563_at             | 0.2                   | 0.2                    | conserved hypothetical protein                           |
| PA0566_at             | 3.1                   | 3.0                    | hypothetical protein                                     |
| PA0651_trpC_at        | 4.7                   | 0.8                    | indole-3-glycerol-phosphate synthase                     |
| PA0672_at             | 0.3                   | 0.3                    | heme oxygenase                                           |
| PA0675_at             | 0.6                   | 0.5                    | probable sigma-70 factor, ECF subfamily                  |
| PA0706_cat_at         | 0.5                   | 0.5                    | chloramphenicol acetyltransferase                        |
| PA0736_at             | 0.4                   | 0.5                    | hypothetical protein                                     |
| PA0805_at             | 0.4                   | 0.6                    | hypothetical protein                                     |
| PA0807_at             | 1.6                   | 2.4                    | conserved hypothetical protein                           |
| PA0817_at             | 1.6                   | 2.0                    | probable ring-cleaving dioxygenase                       |
| PA0884_at             | 2.6                   | 3.1                    | probable C4-dicarboxylate-binding periplasmic protein    |
| PA0931_at             | 0.3                   | 0.5                    | siderophore receptor protein                             |
| PA0938_at             | 0.2                   | 0.4                    | hypothetical protein                                     |
| PA1012_at             | 0.4                   | 0.7                    | conserved hypothetical protein                           |
| PA1132_at             | 0.4                   | 0.3                    | hypothetical protein                                     |
| PA1300_at             | 0.5                   | 0.4                    | probable sigma-70 factor, ECF subfamily                  |
| PA1301_at             | 0.7                   | 0.4                    | probable transmembrane sensor                            |
| PA1302_at             | 0.3                   | 0.4                    | probable heme utilization protein precursor              |
| PA1325_at             | 0.4                   | 0.2                    | conserved hypothetical protein                           |
| PA1361_at             | 0.4                   | 0.5                    | probable transporter                                     |

**Table S2. (continued)**

| <b>Gene name</b> | <b><i>gacA</i>/wt</b> | <b><i>rsmYZ</i>/wt</b> | <b>Description</b>                                       |
|------------------|-----------------------|------------------------|----------------------------------------------------------|
| PA1363_at        | 0.5                   | 0.4                    | probable sigma-70 factor, ECF subfamily                  |
| PA1432_lasl_at   | 0.6                   | 0.5                    | autoinducer synthesis protein LasI                       |
| PA1657_at        | 0.4                   | 0.7                    | conserved hypothetical protein                           |
| PA1688_at        | 1.1                   | 0.4                    | hypothetical protein                                     |
| PA1692_at        | 1.9                   | 2.5                    | probable translocation protein in type III secretion     |
| PA1693_pscR_at   | 2.8                   | 3.7                    | translocation protein in type III secretion              |
| PA1694_pscQ_at   | 2.8                   | 3.3                    | translocation protein in type III secretion              |
| PA1695_pscP_at   | 2.5                   | 2.7                    | translocation protein in type III secretion              |
| PA1697_at        | 2.2                   | 2.0                    | ATP synthase in type III secretion system                |
| PA1698_popN_at   | 2.6                   | 2.4                    | Type III secretion outer membrane protein PopN precursor |
| PA1700_at        | 2.7                   | 2.3                    | conserved hypothetical protein in type III secretion     |
| PA1705_pcrG_i_at | 2.8                   | 2.4                    | regulator in type III secretion                          |
| PA1706_pcrV_at   | 3.9                   | 3.9                    | type III secretion protein PcrV                          |
| PA1707_pcrH_at   | 4.5                   | 4.7                    | regulatory protein PcrH                                  |
| PA1708_popB_at   | 4.2                   | 4.2                    | translocator protein PopB                                |
| PA1709_popD_at   | 4.5                   | 4.4                    | Translocator outer membrane protein PopD precursor       |
| PA1710_exsC_at   | 2.5                   | 2.1                    | exoenzyme S synthesis protein C precursor                |
| PA1711_at        | 3.0                   | 2.5                    | hypothetical protein                                     |
| PA1712_exsB_at   | 2.8                   | 2.7                    | exoenzyme S synthesis protein B                          |
| PA1714_at        | 2.5                   | 2.2                    | hypothetical protein                                     |
| PA1715_pscB_at   | 5.4                   | 3.9                    | type III export apparatus protein                        |
| PA1716_pscC_at   | 3.4                   | 3.2                    | Type III secretion outer membrane protein PscC precursor |
| PA1717_pscD_at   | 2.3                   | 2.3                    | type III export protein PscD                             |
| PA1718_pscE_at   | 3.5                   | 4.2                    | type III export protein PscE                             |
| PA1719_pscF_at   | 3.5                   | 4.4                    | type III export protein PscF                             |
| PA1720_pscG_at   | 3.1                   | 3.9                    | type III export protein PscG                             |
| PA1721_pscH_at   | 3.1                   | 4.0                    | type III export protein PscH                             |
| PA1722_pscI_at   | 3.2                   | 4.1                    | type III export protein PscI                             |
| PA1723_pscJ_at   | 2.5                   | 3.1                    | type III export protein PscJ                             |
| PA1724_pscK_at   | 1.6                   | 2.3                    | type III export protein PscK                             |
| PA1725_pscL_at   | 1.8                   | 2.8                    | type III export protein PscL                             |
| PA1842_at        | 0.6                   | 0.5                    | hypothetical protein                                     |
| PA1887_at        | 0.9                   | 0.5                    | hypothetical protein                                     |
| PA1894_at        | 0.3                   | 0.5                    | hypothetical protein                                     |
| PA1897_at        | 0.5                   | 0.4                    | hypothetical protein                                     |
| PA1913_at        | 0.4                   | 0.4                    | hypothetical protein                                     |
| PA1941_at        | 0.4                   | 0.4                    | hypothetical protein                                     |
| PA1974_at        | 3.7                   | 4.4                    | hypothetical protein                                     |
| PA1976_at        | 6.9                   | 7.8                    | probable two-component sensor                            |
| PA1977_at        | 2.5                   | 2.3                    | hypothetical protein                                     |
| PA1978_at        | 12.1                  | 11.2                   | probable transcriptional regulator                       |
| PA1979_at        | 27.0                  | 27.6                   | probable two-component sensor                            |
| PA1980_at        | 11.6                  | 12.5                   | probable two-component response regulator                |
| PA1981_at        | 7.6                   | 7.6                    | hypothetical protein                                     |
| PA1982_exaA_at   | 5.7                   | 6.2                    | quinoprotein alcohol dehydrogenase                       |
| PA1983_exaB_at   | 109.8                 | 97.7                   | cytochrome c550                                          |
| PA1984_s_at      | 7.8                   | 7.3                    | probable aldehyde dehydrogenase                          |
| PA1985_pqqA_at   | 6.2                   | 5.9                    | pyrroloquinoline quinone biosynthesis protein A          |
| PA1986_pqqB_at   | 9.6                   | 9.4                    | pyrroloquinoline quinone biosynthesis protein B          |

**Table S2. (continued)**

| <b>Gene name</b> | <b><i>gacA</i>/wt</b> | <b><i>rsmYZ</i>/wt</b> | <b>Description</b>                                  |
|------------------|-----------------------|------------------------|-----------------------------------------------------|
| PA1987_pqqC_at   | 8.0                   | 6.4                    | pyrroloquinoline quinone biosynthesis protein C     |
| PA1988_pqqD_at   | 9.7                   | 8.8                    | pyrroloquinoline quinone biosynthesis protein D     |
| PA1989_pqqE_at   | 4.8                   | 5.4                    | pyrroloquinoline quinone biosynthesis protein E     |
| PA1990_at        | 4.8                   | 5.5                    | probable peptidase                                  |
| PA2033_at        | 0.4                   | 0.4                    | hypothetical protein                                |
| PA2034_at        | 0.4                   | 0.4                    | hypothetical protein                                |
| PA2189_at        | 2.5                   | 2.7                    | hypothetical protein                                |
| PA2191_exoY_at   | 4.3                   | 4.3                    | adenylate cyclase ExoY                              |
| PA2193_hcnA_at   | 0.2                   | 0.2                    | hydrogen cyanide synthase HcnA                      |
| PA2361_at        | 0.4                   | 0.5                    | hypothetical protein                                |
| PA2362_at        | 0.5                   | 0.2                    | hypothetical protein                                |
| PA2363_at        | 0.5                   | 0.5                    | hypothetical protein                                |
| PA2365_at        | 0.2                   | 0.2                    | conserved hypothetical protein                      |
| PA2366_at        | 0.2                   | 0.2                    | conserved hypothetical protein                      |
| PA2367_at        | 0.2                   | 0.2                    | hypothetical protein                                |
| PA2368_i_at      | 0.2                   | 0.1                    | hypothetical protein                                |
| PA2423_at        | 0.6                   | 0.1                    | hypothetical protein                                |
| PA2426_pvdS_at   | 0.4                   | 0.4                    | sigma factor PvdS                                   |
| PA2441_at        | 0.3                   | 0.3                    | hypothetical protein                                |
| PA2454_at        | 0.5                   | 0.4                    | hypothetical protein                                |
| PA2464_at        | 0.5                   | 0.5                    | hypothetical protein                                |
| PA2468_at        | 0.6                   | 0.4                    | probable sigma-70 factor, ECF subfamily             |
| PA2496_at        | 0.9                   | 0.4                    | hypothetical protein                                |
| PA2516_xylZ_at   | 0.7                   | 0.2                    | toluate 1,2-dioxygenase electron transfer component |
| PA2537_at        | 0.3                   | 0.3                    | probable acyltransferase                            |
| PA2539_at        | 0.5                   | 0.2                    | conserved hypothetical protein                      |
| PA2540_at        | 0.3                   | 0.4                    | conserved hypothetical protein                      |
| PA2541_at        | 0.5                   | 0.5                    | probable CDP-alcohol phosphatidyltransferase        |
| PA2560_at        | 1.5                   | 0.5                    | hypothetical protein                                |
| PA2581_at        | 0.6                   | 0.5                    | hypothetical protein ; tRNA-Cys                     |
| PA2684_at        | 0.6                   | 0.4                    | conserved hypothetical protein                      |
| PA2686_pfeR_at   | 0.4                   | 0.6                    | two-component response regulator PfeR               |
| PA2703_at        | 0.4                   | 0.4                    | hypothetical protein                                |
| PA2725_at        | 0.6                   | 0.3                    | probable chaperone                                  |
| PA2726_at        | 0.4                   | 0.7                    | probable radical activating enzyme                  |
| PA2727_at        | 0.3                   | 0.3                    | hypothetical protein                                |
| PA2780_at        | 0.4                   | 0.6                    | hypothetical protein                                |
| PA2782_at        | 1.9                   | 2.1                    | hypothetical protein                                |
| PA2793_at        | 0.5                   | 0.3                    | hypothetical protein                                |
| PA2924_hisQ_at   | 2.4                   | 2.7                    | histidine transport system permease HisQ            |
| PA2976_rne_at    | 0.6                   | 0.5                    | ribonuclease E                                      |
| PA3015_at        | 0.6                   | 0.3                    | hypothetical protein                                |
| PA3021_at        | 0.4                   | 0.4                    | hypothetical protein                                |
| PA3062_at        | 0.4                   | 0.5                    | hypothetical protein                                |
| PA3186_oprB_s_at | 0.7                   | 0.4                    | Glucose/carbohydrate outer membrane porin OprB      |
| PA3189_at        | 0.4                   | 0.4                    | probable permease of ABC sugar transporter          |
| PA3273_at        | 3.0                   | 2.4                    | hypothetical protein                                |
| PA3280_oprO_at   | 1.0                   | 2.2                    | Pyrophosphate-specific outer membrane porin OprO    |
| PA3374_at        | 1.2                   | 4.2                    | conserved hypothetical protein                      |

**Table S2. (continued)**

| <b>Gene name</b> | <b><i>gacA</i>/wt</b> | <b><i>rsmYZ</i>/wt</b> | <b>Description</b>                                           |
|------------------|-----------------------|------------------------|--------------------------------------------------------------|
| PA3375_at        | 0.9                   | 3.5                    | probable ATP-binding component of ABC transporter            |
| PA3377_at        | 1.1                   | 2.8                    | conserved hypothetical protein                               |
| PA3378_at        | 0.9                   | 2.3                    | conserved hypothetical protein                               |
| PA3379_at        | 1.0                   | 2.7                    | conserved hypothetical protein                               |
| PA3380_at        | 1.6                   | 3.3                    | conserved hypothetical protein                               |
| PA3407_hasAp_at  | 0.4                   | 0.4                    | heme acquisition protein HasAp                               |
| PA3461_at        | 1.2                   | 2.1                    | conserved hypothetical protein                               |
| PA3484_at        | 0.5                   | 0.4                    | hypothetical protein                                         |
| PA3715_at        | 0.9                   | 0.3                    | hypothetical protein                                         |
| PA3716_at        | 0.5                   | 0.4                    | hypothetical protein                                         |
| PA3722_at        | 0.4                   | 0.3                    | hypothetical protein                                         |
| PA3729_at        | 0.4                   | 0.4                    | conserved hypothetical protein                               |
| PA3730_at        | 0.4                   | 0.4                    | hypothetical protein                                         |
| PA3742_rplS_at   | 0.6                   | 0.5                    | 50S ribosomal protein L19                                    |
| PA3743_trmD_at   | 0.5                   | 0.4                    | tRNA (guanine-N1)-methyltransferase                          |
| PA3744_rimM_at   | 0.7                   | 0.5                    | 16S rRNA processing protein                                  |
| PA3745_rpsP_at   | 0.7                   | 0.5                    | 30S ribosomal protein S16                                    |
| PA3779_at        | 0.5                   | 0.6                    | hypothetical protein                                         |
| PA3789_at        | 2.1                   | 2.1                    | hypothetical protein                                         |
| PA3840_at        | 2.6                   | 2.4                    | conserved hypothetical protein                               |
| PA3841_exoS_at   | 4.8                   | 4.7                    | exoenzyme S                                                  |
| PA3842_at        | 4.0                   | 3.7                    | probable chaperone                                           |
| PA3899_at        | 0.5                   | 0.5                    | probable sigma-70 factor, ECF subfamily                      |
| PA3904_i_at      | 0.3                   | 0.5                    | hypothetical protein                                         |
| PA3919_at        | 1.7                   | 3.0                    | conserved hypothetical protein                               |
| PA4034_aqpZ_at   | 0.4                   | 0.6                    | aquaporin Z                                                  |
| PA4139_at        | 0.5                   | 0.4                    | hypothetical protein                                         |
| PA4140_at        | 0.8                   | 0.4                    | hypothetical protein                                         |
| PA4156_at        | 0.5                   | 0.6                    | probable TonB-dependent receptor                             |
| PA4160_fepD_at   | 1.0                   | 0.4                    | ferric enterobactin transport protein FepD                   |
| PA4168_at        | 0.2                   | 0.1                    | probable TonB-dependent receptor                             |
| PA4196_at        | 2.1                   | 1.8                    | probable two-component response regulator                    |
| PA4198_at        | 7.4                   | 6.4                    | probable AMP-binding enzyme                                  |
| PA4199_at        | 3.0                   | 2.5                    | probable acyl-CoA dehydrogenase                              |
| PA4220_i_at      | 0.5                   | 0.5                    | hypothetical protein                                         |
| PA4223_at        | 0.4                   | 0.6                    | probable ATP-binding component of ABC transporter            |
| PA4259_rpsS_at   | 0.7                   | 0.5                    | 30S ribosomal protein S19                                    |
| PA4317_at        | 0.4                   | 0.3                    | hypothetical protein                                         |
| PA4375_at        | 0.5                   | 0.3                    | Resistance-Nodulation-Cell Division (RND) efflux transporter |
| PA4421_at        | 0.8                   | 0.5                    | conserved hypothetical protein                               |
| PA4432_rpsL_at   | 0.5                   | 0.4                    | 30S ribosomal protein S9                                     |
| PA4467_at        | 0.3                   | 0.4                    | hypothetical protein                                         |
| PA4468_sodM_at   | 0.4                   | 0.5                    | superoxide dismutase                                         |
| PA4469_at        | 0.4                   | 0.5                    | hypothetical protein                                         |
| PA4470_fumC1_at  | 0.3                   | 0.4                    | fumarate hydratase                                           |
| PA4471_at        | 0.4                   | 0.3                    | hypothetical protein                                         |
| PA4489_at        | 0.5                   | 0.6                    | conserved hypothetical protein                               |
| PA4514_at        | 0.4                   | 0.3                    | probable outer membrane receptor for iron transport          |
| PA4550_fimU_at   | 1.7                   | 2.0                    | type 4 fimbrial biogenesis protein FimU                      |

**Table S2. (continued)**

| <b>Gene name</b>     | <b><i>gacA</i>/wt</b> | <b><i>rsmYZ</i>/wt</b> | <b>Description</b>                                       |
|----------------------|-----------------------|------------------------|----------------------------------------------------------|
| PA4551_pilV_at       | 1.6                   | 2.2                    | type 4 fimbrial biogenesis protein PilV                  |
| PA4552_pilW_at       | 1.7                   | 2.4                    | type 4 fimbrial biogenesis protein PilW                  |
| PA4555_pilY2_at      | 1.6                   | 2.1                    | type 4 fimbrial biogenesis protein PilY2                 |
| PA4563_rpsT_at       | 0.5                   | 0.4                    | 30S ribosomal protein S20                                |
| PA4567_rpmA_at       | 0.6                   | 0.5                    | 50S ribosomal protein L27                                |
| PA4583_at            | 0.5                   | 0.5                    | conserved hypothetical protein                           |
| PA4624_at            | 0.4                   | 0.6                    | hypothetical protein                                     |
| PA4671_at            | 0.4                   | 0.4                    | probable ribosomal protein L25                           |
| PA4706_at            | 0.5                   | 0.5                    | probable ATP-binding component of ABC transporter        |
| PA4707_at            | 0.5                   | 0.5                    | probable permease of ABC transporter                     |
| PA4709_at            | 0.5                   | 0.5                    | probable hemin degrading factor                          |
| PA4710_at            | 0.3                   | 0.3                    | Haem/Haemoglobin uptake outer membrane receptor PhuR     |
| PA4741_rpsO_at       | 0.8                   | 0.5                    | 30S ribosomal protein S15                                |
| PA4742_truB_at       | 0.7                   | 0.3                    | tRNA pseudouridine 55 synthase                           |
| PA4746_at            | 0.8                   | 0.5                    | conserved hypothetical protein ; tRNA-Met ; tRNA-Leu     |
| PA4747_secG_at       | 0.5                   | 0.5                    | secretion protein SecG                                   |
| PA4774_at            | 0.4                   | 0.5                    | hypothetical protein                                     |
| PA4775_at            | 0.3                   | 0.3                    | hypothetical protein                                     |
| PA4777_at            | 0.5                   | 0.4                    | two-component regulator system signal sensor kinase PmrB |
| PA4782_at            | 0.4                   | 0.3                    | hypothetical protein                                     |
| PA4811_fdhH_at       | 2.4                   | 2.0                    | nitrate-inducible formate dehydrogenase, beta subunit    |
| PA4822_at            | 0.4                   | 0.5                    | hypothetical protein                                     |
| PA4823_at            | 0.1                   | 0.0                    | hypothetical protein                                     |
| PA4825_mgtA_at       | 0.1                   | 0.1                    | Mg(2+) transport ATPase, P-type 2                        |
| PA4826_at            | 0.1                   | 0.0                    | hypothetical protein                                     |
| PA4896_at            | 0.6                   | 0.4                    | probable sigma-70 factor, ECF subfamily                  |
| PA4929_at            | 0.8                   | 0.5                    | hypothetical protein                                     |
| PA4932_rplI_at       | 0.5                   | 0.4                    | 50S ribosomal protein L9                                 |
| PA4934_rpsR_at       | 0.5                   | 0.4                    | 30S ribosomal protein S18                                |
| PA4935_rpsF_at       | 0.5                   | 0.4                    | 30S ribosomal protein S6                                 |
| PA4968_at            | 0.6                   | 0.5                    | conserved hypothetical protein                           |
| PA5114_at            | 0.4                   | 0.4                    | hypothetical protein                                     |
| PA5120_at            | 0.2                   | 0.2                    | hypothetical protein                                     |
| PA5136_at            | 0.7                   | 0.5                    | hypothetical protein                                     |
| PA5137_at            | 0.6                   | 0.5                    | hypothetical protein                                     |
| PA5316_rpmB_at       | 0.6                   | 0.4                    | 50S ribosomal protein L28                                |
| PA5357_at            | 0.5                   | 0.7                    | hypothetical protein                                     |
| PA5441_at            | 0.5                   | 0.3                    | hypothetical protein                                     |
| PA5479_gltP_at       | 0.6                   | 0.4                    | proton-glutamate symporter                               |
| PA5502_at            | 0.7                   | 0.4                    | hypothetical protein                                     |
| Pae_AF241171cds21_at | 0.7                   | 0.5                    |                                                          |
| Pae_AF241171cds22_at | 2.0                   | 2.0                    |                                                          |
| Pae_AF241171cds7_at  | 2.0                   | 2.4                    |                                                          |
| Pae_tRNA_Arg_s_at    | 0.4                   | 0.7                    |                                                          |
| Pae_tRNA_Gly_s_at    | 0.6                   | 0.4                    |                                                          |
| Pae_tRNA_Ile_f_at    | 0.4                   | 0.4                    |                                                          |

**Table S3. Results of the microarray analysis of the *P. aeruginosa* wt, *gacA* and *rsmYZ* mutant. Only those genes whose expression changed >2x relative to wild type in only one of the two mutants are listed.**

| <b><i>Change in gacA only</i></b>  | <b><i>gacA/wt</i></b> | <b><i>rsmYZ/wt</i></b> | <b>Description</b>                          |
|------------------------------------|-----------------------|------------------------|---------------------------------------------|
| PA0651_trpC_at                     | 4.7                   | 0.8                    | indole-3-glycerol-phosphate synthase        |
| <b><i>Change in rsmYZ only</i></b> | <b><i>gacA/wt</i></b> | <b><i>rsmYZ/wt</i></b> | <b>Description</b>                          |
| PA1688_at                          | 1.1                   | 0.4                    | hypothetical protein                        |
| PA1887_at                          | 0.9                   | 0.5                    | hypothetical protein                        |
| PA2496_at                          | 0.9                   | 0.4                    | hypothetical protein                        |
| PA3715_at                          | 0.9                   | 0.3                    | hypothetical protein                        |
| PA4160_fepD_at                     | 1.0                   | 0.4                    | ferric enterobactin transport protein FepD  |
| PA3280_oprO_at                     | 1.0                   | 2.2                    | Pyrophosphate-specific outer membrane porin |
| PA3374_at                          | 1.2                   | 4.2                    | conserved hypothetical protein              |
| PA3375_at                          | 0.9                   | 3.5                    | ATP-binding component of ABC transporter    |
| PA3377_at                          | 1.1                   | 2.8                    | conserved hypothetical protein              |
| PA3378_at                          | 0.9                   | 2.3                    | conserved hypothetical protein              |
| PA3379_at                          | 1.0                   | 2.7                    | conserved hypothetical protein              |
| PA3380_at                          | 1.6                   | 3.3                    | conserved hypothetical protein              |
| PA3461_at                          | 1.2                   | 2.1                    | conserved hypothetical protein              |



**Table S4. Position of the conserved Upstream Activating Sequence (UAS) relative to the sRNA transcription start site in various bacterial species.**

| <b>Bacterial Species</b>            | <b>sRNA</b>       | <b>Distance from the 3' of the UAS to +1 of the RNA (nt)*</b> |
|-------------------------------------|-------------------|---------------------------------------------------------------|
| <i>Pseudomonas aeruginosa</i>       | <i>rsmY</i>       | 57                                                            |
|                                     | <i>rsmZ</i>       | 174                                                           |
| <i>Pseudomonas fluorescens Pf-5</i> | <i>rsmX</i>       | 52                                                            |
|                                     | <i>rsmY</i>       | 57                                                            |
|                                     | <i>rsmZ</i>       | 171                                                           |
| <i>Pseudomonas putida KT2440</i>    | <i>rsmY</i>       | 58                                                            |
|                                     | <i>rsmZ</i>       | 172                                                           |
| <i>Pseudomonas syringae</i>         | <i>rsmX</i>       | 57                                                            |
|                                     | <i>rsmY</i>       | 57                                                            |
|                                     | <i>rsmZ</i>       | 173                                                           |
| <i>Legionella pneumophila Paris</i> | <i>rsmY</i>       | 64                                                            |
|                                     | <i>rsmZ</i>       | 173                                                           |
| <i>Acinetobacter sp ADP1</i>        | <i>rsmX</i>       | 59                                                            |
|                                     | <i>rsmY</i>       | 72                                                            |
|                                     | <i>rsmZ</i>       | 59                                                            |
| <i>Escherichia coli K12</i>         | <i>csrB</i>       | 182                                                           |
|                                     | <i>csrC</i>       | 150                                                           |
| <i>Salmonella typhimurium LT2</i>   | <i>csrB</i>       | 172                                                           |
|                                     | <i>csrC</i>       | 150                                                           |
| <i>Vibrio cholerae</i>              | <i>csrB1/csrC</i> | 158                                                           |
|                                     | <i>csrB2/csrB</i> | 159                                                           |
|                                     | <i>csrB3/csrD</i> | 159                                                           |
| <i>Yersinia pestis C092</i>         | <i>csrB</i>       | 211                                                           |
|                                     | <i>csrC</i>       | 207                                                           |

\* Distances were calculated based on the described or predicted UAS and sRNA genomic locations (Kulkarni *et al.*, Nucleic Acid Research, 2006).

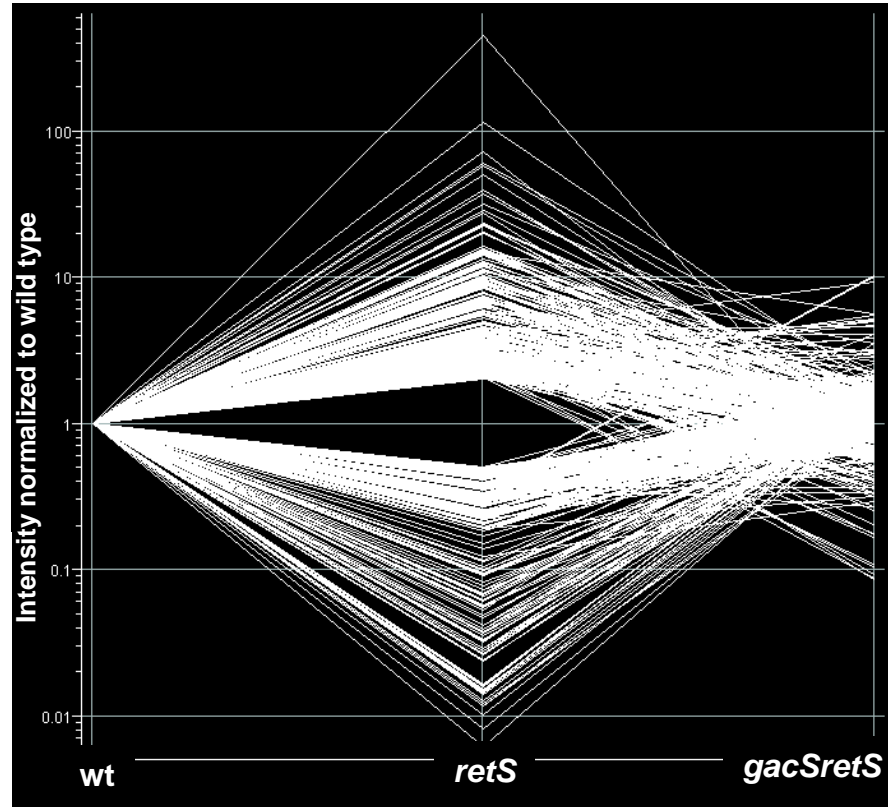

**Figure S1. Comparison of transcript levels in *P. aeruginosa* wild type, *retS* mutant and *retS gacS* double mutant.** Transcriptome of the *P. aeruginosa retS gacS* strain was compared to the previously published transcriptomes of the *P. aeruginosa* wild type and *retS* mutant strains (Goodman *et al.*, 2004). RNA used for the microarray analysis of the *P. aeruginosa retS gacS* double mutant was isolated from cultures in the exponential phase of growth (OD<sub>600</sub>=0.5) exactly following the procedure used in the analysis of the wild type and the *retS* mutant strain. Only those genes whose transcript levels changed more than two fold in the *retS* mutant relative to wild type are shown.

## SUPPORTING EXPERIMENTAL PROCEDURES

### *Construction of in-frame deletion mutants using pEXG2*

Deletion strains were constructed by SOE-PCR of deletion alleles, ligation into plasmid pEXG2 (Rietsch *et al.*, 2005), and allelic exchange by sucrose selection on LB agar containing 6% sucrose as described (Hoang *et al.*, 1998). Plasmids were introduced into recipient cells by conjugation. All mutations were verified by PCR and sequencing. See supporting tables below for more detail.

### *VSV-G tagging of GacA*

The GacA-V integration vector, pP30 $\Delta$ FRT-GacA-V, was constructed by subcloning a *NotI/HindIII* fragment of approximately 600 bp from pP30 $\Delta$ FRT-GacA-TAP, corresponding to a 3' portion of the *gacA* gene, which was amplified by using primers 5' GacA-TAP1 and 3' GacA TAP. This fragment was ligated into *NotI/HindIII*-cut pP30 $\Delta$ FRT-MvaT-V (Castang *et al.*, 2008), such that the *gacA* coding region was in frame with the DNA specifying the VSV-G tag. Plasmid pP30 $\Delta$ FRT-GacA-V and recipient strains PAO1, PAO1  $\Delta$ *retS*, and PAK, PAK *rsmY-lacZ*, and PAK *rsmZ-lacZ* were used to make PAO1 GacA-V, PAO1  $\Delta$ *retS* GacA-V, and PAK GacA-V, PAK GacA-V *rsmY-lacZ*, and PAK GacA-V *rsmZ-lacZ* respectively, by integration of the plasmid into the chromosome (See Supporting Tables below for additional information.). Production of the GacA-V protein was confirmed by Western blot analysis with an anti-VSV-G antibody (Sigma-Aldrich).

### *Construction of lacZ-reporter fusions using mini-CTX-lacZ*

For each gene, regions directly upstream of the coding sequences were PCR-amplified using pairs of primers as indicated in the Supporting Tables below. The resulting fragments were cloned using the indicated restriction sites (Table S4) into mini-CTX-*lacZ*. The resulting plasmids were introduced into *Pseudomonas* wild type and mutant strains by conjugation. In those strains where vector backbones were removed the procedure described by Hoang and colleagues was used (Hoang *et al.*, 1998). See Supporting Tables below for additional information.

### *Construction of pMMB67-PlacUV5-rsmYZ*

*PlacUV5* promoter was fused to the +1 position (transcription start site) of *rsmZ* and *rsmY* genes by SOE-PCR using primers 5' *PlacUV5* (SOE1), 3' *PlacUV5 rsmY* (SOE2), 5' *rsmY* (SOE3), 3' *rsmY* for the construction of the *rsmY* clone, and primers 5' *PlacUV5* (SOE1), 3' *PlacUV5 rsmZ* (SOE2), 5' *rsmZ* (SOE3), 3' *rsmZ* (SOE4) for the construction of the *rsmZ* clone (Table S4). Vector pPSV35 and *P. aeruginosa* genomic DNA were used as templates for amplification of the *PlacUV5* promoter and of the *rsmY* and *rsmZ* genes, respectively. The resulting hybrid fragments were cloned into pMMB67(EH) using *HpaI* and *HindIII* sites, which effectively eliminated the *P<sub>tac</sub>* promoter of the pMMB67 plasmid. The resulting plasmids, of pMMB67-*PlacUV5-rsmY* and pMMB67-*PlacUV5-rsmZ* were introduced to *P. aeruginosa* strains by conjugation.

### *Construction of pPSV40-rsmYZ*

Fragments containing upstream regulatory sequences and coding regions of *rsmZ* and *rsmY* were PCR-amplified using primers described in Table S4. The resulting fragments were cloned into a promoterless pPSV40 vector using restriction sites indicated in Table S4. The resulting plasmids, pPSV40-*rsmY*, and pPSV40-*rsmZ* were introduced to *P. aeruginosa* strains by conjugation.

## SUPPORTING EXPERIMENTAL PROCEDURES - TABLES:

### Primers used in the study

| Gene/Construct                                                                            | Primer Name                                | Sequence*                                                   |
|-------------------------------------------------------------------------------------------|--------------------------------------------|-------------------------------------------------------------|
| <b>Construction of <i>rsmY</i> and <i>rsmZ</i> in frame deletions</b>                     |                                            |                                                             |
| <i>rsmY</i> deletion                                                                      | rsmY-SOE1                                  | TTT gga tcc CCTTGTTGGAGAAACGGAACAGCTGG                      |
|                                                                                           | rsmY-SOE2                                  | GCGGTTTTCTCGGGCAATAAAAGTCCTGACGGTTTGAAGATTACG               |
|                                                                                           | rsmY-SOE3                                  | CGTAATCTTCAAACCGTCAGGACTTTTATTGCCCGAGGAAAACCGC              |
|                                                                                           | rsmY-SOE4                                  | TTT aag ctt GCAGACGGTCAACGCCAGCCTGGTG                       |
| <i>rsmZ</i> deletion                                                                      | rsmZ-SOE1                                  | CCT ggt acc CATGCTCGGCCTGAACGAACGGGTG                       |
|                                                                                           | rsmZ-SOE2                                  | CGACGAGTAAAACGGCAGGCAAAACGCAGGAGTGATATTAGCGATTC             |
|                                                                                           | rsmZ-SOE3                                  | GAATCGCTAATATCACTCCTGCGTTTTGCCTGCCGTTTTACTCGTCCG            |
|                                                                                           | rsmZ-SOE4                                  | GGG gtc gac GCACGAGATGCCGAGCCAGCAGAG                        |
| <b>Construction of <i>rsmY</i> and <i>rsmZ</i> overexpression clones - pPSV40</b>         |                                            |                                                             |
| pPSV40- <i>rsmZ</i>                                                                       | 5' <i>rsmZ</i> -1                          | TCC gaa ttc ATC TCA GCG AAA GCA TCG ACC AGT G               |
|                                                                                           | 3' <i>rsmZ</i> -NEW                        | GGT tct aga CTT TGG CGA CGA GTA AAA CGG CAG                 |
| pPSV40- <i>rsmY</i>                                                                       | 5' <i>rsmY</i> CTX                         | GGTT ctc gag CGG AAA TCA GGT AGT AGA AGG CGT G              |
|                                                                                           | 3' <i>rsmY</i>                             | AAT aag ctt AAG GCG TGG TCT GAG CGA C                       |
| <b>Construction of <i>rsmY</i> and <i>rsmZ</i> overexpression clones - pMMB67-PlacUV5</b> |                                            |                                                             |
| pMMB67-PlacUV5- <i>rsmYZ</i>                                                              | 5' PlacUV5 (SOE1)                          | TTT CAC gtt aac TTC GAC ATT CCT TGT GTA TAA GGG GAC AC      |
|                                                                                           | 3' PlacUV5 <i>rsmZ</i> (SOE2)              | GGT TGC GTG TTC CCT GTA CG CCA CAC ATT ATA CGA GCC GGA AGC  |
|                                                                                           | 5' <i>rsmZ</i> (SOE3)                      | GCT TCC GGC TCG TAT AAT GTG TGG CGT ACA GGG AAC ACG CAA CC  |
|                                                                                           | 3' <i>rsmZ</i> (SOE4)                      | GCC aag ctt CCG AAC ATC ACC GAG AAG AAG GA                  |
|                                                                                           | 3' PlacUV5 <i>rsmY</i> (SOE2)              | CTT CCT GCG CAA TGT CCT GAC CCA CAC ATT ATA CGA GCC GGA AGC |
|                                                                                           | 5' <i>rsmY</i> (SOE3)                      | GCT TCC GGC TCG TAT AAT GTG TGG GTC AGG ACA TTG CGC AGG AAG |
| 3' <i>rsmY</i>                                                                            | AAT aag ctt AAG GCG TGG TCT GAG CGA C      |                                                             |
| <b>Construction of <i>lacZ</i>-fusions</b>                                                |                                            |                                                             |
| <i>exoS</i>                                                                               | 5' <i>exoS</i>                             | GGTTt aag ctt GGC TGA ACA GGT TCT GCT CGT TG                |
|                                                                                           | 3' <i>exoS</i> PR                          | AACA gaa ttc GGG CCT CAA TCT GTC CCA AAC G                  |
| <i>rsmY</i>                                                                               | 5' <i>rsmY</i> CTX                         | GGTT ctc gag CGG AAA TCA GGT AGT AGA AGG CGT G              |
|                                                                                           | 5' <i>rsmY</i> -2                          | CCC gaa ttc GCG AGC GGA ACT ATT ACA GCG                     |
|                                                                                           | 5' <i>rsmY</i> -3                          | CTT gaa ttc GGT GGT TTT GGC TGC TTT CTC C                   |
| <i>rsmZ</i>                                                                               | 3' <i>rsmY</i> CTX                         | AACA aag ctt CAG ACC TCT ATC CTG ACA TCC GTG                |
|                                                                                           | 5' <i>rsmZ</i> -1                          | TCC gaa ttc ATC TCA GCG AAA GCA TCG ACC AGT G               |
|                                                                                           | 5' <i>rsmZ</i>                             | GAT gaa ttc CAG TGA CGG AAA ACC TTA GAC CCA                 |
|                                                                                           | 5' <i>rsmZ</i> NEW                         | GGT gaa ttc CAC TGA AGA CCC GGC GTT CG                      |
|                                                                                           | 5' <i>rsmZ</i> -3                          | TCT gaa ttc GTG AGC CTA AGT AGA TAA ATG CCC GG              |
| PA2004/2005                                                                               | 3' <i>rsmZ</i> -1                          | CCT gga tcc GAT CCT TCG GGG TTG CGT GTT C                   |
|                                                                                           | PA2004-01                                  | TTT aag ctt CGC TCT GCG AGT CGA TCC TCG                     |
| <i>trpGC</i>                                                                              | PA2004-03                                  | TTT aag ctt CGA ACA GGA TGA CGC TGT AGC                     |
|                                                                                           | 5' <i>trpG</i> -1                          | CTT aag ctt GGA TCA GGT TTC CAG AGA GCG GG                  |
|                                                                                           | 3' <i>trpG</i> -1                          | TAT gaa ttc CAC CAG GTT GTA GGT GAA GGA GTC GTA G           |
|                                                                                           | 5' <i>trpC</i> -2                          | TTT gaa ttc TCG GCG ATG CCT TCT TGA TCT CG                  |
| 3' <i>trpC</i> -4                                                                         | TAT aag ctt CAC ATT GCC GAG TTG AAG GAC GG |                                                             |
| <b>Construction of <i>GacA</i>-VSV-G</b>                                                  |                                            |                                                             |
| pP30ΔFRT- <i>Gac</i> -VSV-G                                                               | 5' <i>GacA</i> TAP 1                       | CCT aag ctt GAC TGC GGT GAA GAC TGT CTG AAA CTG             |
|                                                                                           | 3' <i>GacA</i> TAP                         | TAGA gcgccgc GCT GGC GGC ATC GAC CAT G                      |

\*small caps are used to indicate the restriction sites

## Plasmids used in the study

| Plasmid                                            | Characteristics / Primers used in construction                                                                                            | Reference                          |
|----------------------------------------------------|-------------------------------------------------------------------------------------------------------------------------------------------|------------------------------------|
| <b>Constructions of in frame deletions*</b>        |                                                                                                                                           |                                    |
| pEXG2                                              | ColE1 <i>mob+</i> <i>sacB+</i> suicide vector (Gm <sup>r</sup> )                                                                          | (Rietsch <i>et al.</i> , 2005)     |
| pEXG2- $\Delta$ <i>rsmY</i>                        | <i>rsmY</i> -SOE1, SOE2, SOE3, SOE4                                                                                                       | This study                         |
| pEXG2- $\Delta$ <i>rsmZ</i>                        | <i>rsmZ</i> -SOE1, SOE2, SOE3, SOE4                                                                                                       | This study                         |
| <b>Construction of <i>lacZ</i>-fusions*</b>        |                                                                                                                                           |                                    |
| mini-CTX- <i>lacZ</i>                              | integrative gene reporter vector (Tc <sup>r</sup> )                                                                                       | (Becher and Schweizer, 2000)       |
| pCTX- <i>exoS-lacZ</i>                             | 5' <i>exoS</i> PR, 3' <i>exoS</i>                                                                                                         | This study                         |
| pCTX- <i>rsmY-lacZ</i>                             | 5' <i>rsmY</i> CTX, 3' <i>rsmY</i> CTX                                                                                                    | (Brencic and Lory, 2009)           |
| pCTX- <i>rsmZ-lacZ</i>                             | 5' <i>rsmZ</i> -1, 3' <i>rsmZ</i> -1                                                                                                      | This study                         |
| pCTX- <i>rsmY-lacZ</i> -2                          | 5' <i>rsmY</i> -2, 3' <i>rsmY</i> CTX                                                                                                     | This study                         |
| pCTX- <i>rsmY-lacZ</i> -3                          | 5' <i>rsmY</i> -3, 3' <i>rsmY</i> CTX                                                                                                     | This study                         |
| pCTX- <i>rsmZ-lacZ</i> -2                          | 5' <i>rsmZ</i> , 3' <i>rsmZ</i> -1                                                                                                        | This study                         |
| pCTX- <i>rsmZ-lacZ</i> -3                          | 5' <i>rsmZ</i> -NEW, 3' <i>rsmZ</i> -1                                                                                                    | This study                         |
| pCTX- <i>rsmZ-lacZ</i> -4                          | 5' <i>rsmZ</i> -3, 3' <i>rsmZ</i> -1                                                                                                      | This study                         |
| pCTX- <i>trpG-lacZ</i>                             | 5' <i>trpG</i> -1, 3' <i>trpG</i> -1                                                                                                      | This study                         |
| pCTX- <i>trpC-lacZ</i>                             | 5' <i>trpC</i> -2, 3' <i>trpC</i> -4                                                                                                      | This study                         |
| pCTX-PA2004/2005- <i>lacZ</i>                      | PA2004-01, PA2004-03                                                                                                                      | This study                         |
| pCTX-PA2005/2004- <i>lacZ</i>                      | PA2004-01, PA2004-03                                                                                                                      | This study                         |
| <b>Construction of GacA-VSV-G*</b>                 |                                                                                                                                           |                                    |
| pP30 $\Delta$ FRT-MvaT-V                           |                                                                                                                                           | (Castang <i>et al.</i> , 2008)     |
| pP30 $\Delta$ FRT-GacA-TAP                         | 5' GacA TAP 1, 3' GacA TAP                                                                                                                | (Vallet-Gely <i>et al.</i> , 2005) |
| pP30 $\Delta$ FRT-GacA-V                           | see supporting text                                                                                                                       | This study                         |
| <b><i>rsmZ</i> and <i>rsmY</i> overexpression*</b> |                                                                                                                                           |                                    |
| pPSV40                                             | <i>P. aeruginosa oriV</i> , <i>mob+</i> pUC18 MCS cloning vector (Gm <sup>r</sup> )                                                       | (Rietsch <i>et al.</i> , 2005)     |
| pPSV40- <i>rsmY</i>                                | 5' <i>rsmY</i> CTX, 3' <i>rsmY</i>                                                                                                        | This study                         |
| pPSV40- <i>rsmZ</i>                                | 5' <i>rsmZ</i> -1, 3' <i>rsmZ</i> NEW                                                                                                     | This study                         |
| pPSV35                                             | <i>P. aeruginosa oriV</i> , <i>lacI<sup>f</sup></i> <i>mob+</i> P <sub><i>lacUV5</i></sub> pUC18 MCS expression vector (Gm <sup>r</sup> ) | (Rietsch <i>et al.</i> , 2005)     |
| pMMB67(EH)                                         | IncQ, RSF1010, <i>lacI<sup>f</sup></i> P <sub><i>tac</i></sub> expression vector (Ap <sup>r</sup> )                                       | (Furste <i>et al.</i> , 1986)      |
| pMMB67-PlacUV5- <i>rsmY</i>                        | 5' PlacUV5 (SOE1), 3' PlacUV5 <i>rsmY</i> (SOE2), 5' <i>rsmY</i> (SOE3), 3' <i>rsmY</i>                                                   | This study                         |
| pMMB67-PlacUV5- <i>rsmZ</i>                        | 5' PlacUV5 (SOE1), 3' PlacUV5 <i>rsmZ</i> (SOE2), 5' <i>rsmZ</i> (SOE3), 3' <i>rsmZ</i> (SOE4)                                            | This study                         |

\* For more detail, see supporting experimental procedures - text.

***P. aeruginosa* strains used in the study\***

| Strain                                                     | Characteristics                                                                                   | Reference                      |
|------------------------------------------------------------|---------------------------------------------------------------------------------------------------|--------------------------------|
| <b>Figure 1</b>                                            |                                                                                                   |                                |
| PAK                                                        | wild type, laboratory collection                                                                  | -                              |
| PAK $\Delta retS$                                          | deletion mutant;                                                                                  | (Goodman <i>et al.</i> , 2004) |
| PAK $\Delta gacS$                                          | deletion mutant                                                                                   | (Ventre <i>et al.</i> , 2006)  |
| PAK $\Delta gacA$                                          | deletion mutant                                                                                   | (Goodman <i>et al.</i> , 2009) |
| PAK $\Delta rsmY$                                          | deletion mutant                                                                                   | This study                     |
| PAK $\Delta rsmZ$                                          | deletion mutant                                                                                   | This study                     |
| PAK $\Delta rsmY \Delta rsmZ$                              | double deletion mutant                                                                            | This study                     |
| PAK $\Delta rsmA$                                          | deletion mutant                                                                                   | (Ventre <i>et al.</i> , 2006)  |
| PAK <i>exoS-lacZ</i>                                       | pCTX- <i>exoS-lacZ</i> was conjugated into the wt strain, vector backbone was removed             | This study                     |
| PAK $\Delta retS$ <i>exoS-lacZ</i>                         | pCTX- <i>exoS-lacZ</i> was conjugated into the $\Delta retS$ strain, vector backbone was removed  | This study                     |
| PAK $\Delta gacS$ <i>exoS-lacZ</i>                         | pCTX- <i>exoS-lacZ</i> was conjugated into the $\Delta gacS$ strain, vector backbone was removed  | This study                     |
| PAK $\Delta gacA$ <i>exoS-lacZ</i>                         | pCTX- <i>exoS-lacZ</i> was conjugated into the $\Delta gacA$ strain, vector backbone was removed  | This study                     |
| PAK $\Delta rsmZ$ <i>exoS-lacZ</i>                         | pCTX- <i>exoS-lacZ</i> was conjugated into the $\Delta rsmZ$ strain, vector backbone was removed  | This study                     |
| PAK $\Delta rsmY$ <i>exoS-lacZ</i>                         | pCTX- <i>exoS-lacZ</i> was conjugated into the $\Delta rsmY$ strain, vector backbone was removed  | This study                     |
| PAK $\Delta rsmYZ$ <i>exoS-lacZ</i>                        | pCTX- <i>exoS-lacZ</i> was conjugated into the $\Delta rsmYZ$ strain, vector backbone was removed | This study                     |
| PAK $\Delta rsmA$ <i>exoS-lacZ</i>                         | pCTX- <i>exoS-lacZ</i> was conjugated into the $\Delta rsmA$ strain, vector backbone was removed  | This study                     |
| <b>Figure 2</b>                                            |                                                                                                   |                                |
| PAK <i>exoS-lacZ</i> (pPSV40) $Gm^R$                       | pPSV40 plasmid was introduced into PAK <i>exoS-lacZ</i> strain by conjugation                     | This study                     |
| PAK <i>exoS-lacZ</i> (pPSV40- <i>rsmY</i> ) $Gm^R$         | pPSV40- <i>rsmY</i> was introduced into PAK <i>exoS-lacZ</i> strain by conjugation                | This study                     |
| PAK <i>exoS-lacZ</i> (pPSV40- <i>rsmZ</i> ) $Gm^R$         | pPSV40- <i>rsmZ</i> was introduced into PAK <i>exoS-lacZ</i> strain by conjugation                | This study                     |
| PAK <i>exoS-lacZ</i> (pMMB67) $Gm^R$                       | pMMB67 plasmid was introduced into PAK <i>exoS-lacZ</i> strain by conjugation                     | This study                     |
| PAK <i>exoS-lacZ</i> (pMMB67-PlacUV5- <i>rsmY</i> ) $Gm^R$ | pMMB67-PlacUV5- <i>rsmY</i> was introduced into PAK <i>exoS-lacZ</i> strain by conjugation        | This study                     |
| PAK <i>exoS-lacZ</i> (pMMB67-PlacUV5- <i>rsmZ</i> ) $Gm^R$ | pMMB67-PlacUV5- <i>rsmZ</i> was introduced into PAK <i>exoS-lacZ</i> strain by conjugation        | This study                     |
| <b>Figure 3</b>                                            |                                                                                                   |                                |
| PAK ::pCTX- <i>trpG-lacZ</i> $Tc^R$                        | pCTX- <i>trpG-lacZ</i> plasmid was introduced into the wt strain by conjugation                   | This study                     |
| PAK $\Delta gacA$ ::pCTX- <i>trpG-lacZ</i> $Tc^R$          | pCTX- <i>trpG-lacZ</i> plasmid was introduced into the $\Delta gacA$ strain by conjugation        | This study                     |
| PAK $\Delta rsmYZ$ ::pCTX- <i>trpG-lacZ</i> $Tc^R$         | pCTX- <i>trpG-lacZ</i> plasmid was introduced into the $\Delta rsmYZ$ strain by conjugation       | This study                     |
| PAK ::pCTX- <i>trpC-lacZ</i> $Tc^R$                        | pCTX- <i>trpC-lacZ</i> plasmid was introduced into the wt strain by conjugation                   | This study                     |
| PAK $\Delta gacA$ ::pCTX- <i>trpC-lacZ</i> $Tc^R$          | pCTX- <i>trpC-lacZ</i> plasmid was introduced into the $\Delta gacA$ strain by conjugation        | This study                     |
| PAK $\Delta rsmYZ$ ::pCTX- <i>trpC-lacZ</i> $Tc^R$         | pCTX- <i>trpC-lacZ</i> plasmid was introduced into the $\Delta rsmYZ$ strain by conjugation       | This study                     |
| <b>Figure 4</b>                                            |                                                                                                   |                                |
| PAO1                                                       | wild type, laboratory collection                                                                  | -                              |
| PAO1 $\Delta retS$                                         | deletion mutant; provided by Josh Sharp, Children's Hospital Boston                               | This study                     |
| PAO1 <i>gacA-V</i> $Gm^R$                                  | pP30 $\Delta$ FRT-GacA-V was introduced into the wt strain by conjugation                         | This study                     |
| PAO1 $\Delta retS$ <i>gacA-V</i> $Gm^R$                    | pP30 $\Delta$ FRT-GacA-V was introduced into the $\Delta retS$ strain by conjugation              | This study                     |
| PAK <i>rsmY-lacZ</i>                                       | pCTX- <i>rsmY-lacZ</i> was conjugated into the wt strain, vector backbone was removed             | (Brencic and Lory, 2009)       |
| PAK $\Delta retS$ <i>rsmY-lacZ</i>                         | pCTX- <i>rsmY-lacZ</i> was conjugated into the $\Delta retS$ strain, vector backbone was removed  | This study                     |
| PAK $\Delta gacS$ <i>rsmY-lacZ</i>                         | pCTX- <i>rsmY-lacZ</i> was conjugated into the $\Delta gacS$ strain, vector backbone was removed  | This study                     |
| PAK $\Delta gacA$ <i>rsmY-lacZ</i>                         | pCTX- <i>rsmY-lacZ</i> was conjugated into the $\Delta gacA$ strain, vector backbone was removed  | This study                     |
| PAK <i>gacA-V</i> <i>rsmY-lacZ</i> $Gm^R$                  | pP30 $\Delta$ FRT-GacA-V was introduced into the PAK <i>rsmY-lacZ</i> strain by conjugation       | This study                     |
| PAK <i>rsmZ-lacZ</i>                                       |                                                                                                   | (Ventre <i>et al.</i> , 2006)  |
| PAK $\Delta retS$ <i>rsmZ-lacZ</i>                         |                                                                                                   | (Ventre <i>et al.</i> , 2006)  |
| PAK $\Delta gacS$ <i>rsmZ-lacZ</i>                         |                                                                                                   | (Ventre <i>et al.</i> , 2006)  |
| PAK $\Delta gacA$ <i>rsmZ-lacZ</i>                         |                                                                                                   | (Ventre <i>et al.</i> , 2006)  |
| PAK <i>gacA-V</i> <i>rsmZ-lacZ</i> $Gm^R$                  | pP30 $\Delta$ FRT-GacA-V was introduced into the PAK <i>rsmZ-lacZ</i> strain by conjugation       | This study                     |
| PAK ::pCTX-PA2004/05- <i>lacZ</i> $Tc^R$                   | pCTX-PA2004/05- <i>lacZ</i> was introduced into the wt strain by conjugation                      | This study                     |
| PAK $\Delta retS$ ::pCTX-PA2004/05- <i>lacZ</i> $Tc^R$     | pCTX-PA2004/05- <i>lacZ</i> was introduced into the $\Delta retS$ strain by conjugation           | This study                     |
| PAK $\Delta gacS$ ::pCTX-PA2004/05- <i>lacZ</i> $Tc^R$     | pCTX-PA2004/05- <i>lacZ</i> was introduced into the $\Delta gacS$ strain by conjugation           | This study                     |
| PAK $\Delta gacA$ ::pCTX-PA2004/05- <i>lacZ</i> $Tc^R$     | pCTX-PA2004/05- <i>lacZ</i> was introduced into the $\Delta gacA$ strain by conjugation           | This study                     |
| PAK ::pCTX-PA2005/04- <i>lacZ</i> $Tc^R$                   | pCTX-PA2005/04- <i>lacZ</i> was introduced into the wt strain by conjugation                      | This study                     |
| PAK $\Delta retS$ ::pCTX-PA2005/04- <i>lacZ</i> $Tc^R$     | pCTX-PA2005/04- <i>lacZ</i> was introduced into the $\Delta retS$ strain by conjugation           | This study                     |
| PAK $\Delta gacS$ ::pCTX-PA2005/04- <i>lacZ</i> $Tc^R$     | pCTX-PA2005/04- <i>lacZ</i> was introduced into the $\Delta gacS$ strain by conjugation           | This study                     |
| PAK $\Delta gacA$ ::pCTX-PA2005/04- <i>lacZ</i> $Tc^R$     | pCTX-PA2005/04- <i>lacZ</i> was introduced into the $\Delta gacA$ strain by conjugation           | This study                     |

***P. aeruginosa* strains used in the study – continued\***

| Strain                                                | Characteristics                                                                                     | Reference                          |
|-------------------------------------------------------|-----------------------------------------------------------------------------------------------------|------------------------------------|
| <b>Figure 5</b>                                       |                                                                                                     |                                    |
| PAK ::pCTX- <i>rsmY-lacZ</i> (1)                      | pCTX- <i>rsmY-lacZ</i> plasmid was introduced into the wt strain by conjugation                     | This study                         |
| PAK ::pCTX- <i>rsmY-lacZ</i> (2)                      | pCTX- <i>rsmY-lacZ-2</i> plasmid was introduced into the wt strain by conjugation                   | This study                         |
| PAK ::pCTX- <i>rsmY-lacZ</i> (3)                      | pCTX- <i>rsmY-lacZ-3</i> plasmid was introduced into the wt strain by conjugation                   | This study                         |
| PAK ::pCTX- <i>rsmZ-lacZ</i> (1)                      | pCTX- <i>rsmZ-lacZ-1</i> plasmid was introduced into the wt strain by conjugation                   | This study                         |
| PAK ::pCTX- <i>rsmZ-lacZ</i> (2)                      | pCTX- <i>rsmZ-lacZ-2</i> plasmid was introduced into the wt strain by conjugation                   | This study                         |
| PAK ::pCTX- <i>rsmZ-lacZ</i> (3)                      | pCTX- <i>rsmZ-lacZ-3</i> plasmid was introduced into the wt strain by conjugation                   | This study                         |
| PAK ::pCTX- <i>rsmZ-lacZ</i> (4)                      | pCTX- <i>rsmZ-lacZ-4</i> plasmid was introduced into the wt strain by conjugation                   | This study                         |
| PAK $\Delta$ <i>gacA</i> ::pCTX- <i>rsmY-lacZ</i> (1) | pCTX- <i>rsmY-lacZ</i> plasmid was introduced into the $\Delta$ <i>gacA</i> strain by conjugation   | This study                         |
| PAK $\Delta$ <i>gacA</i> ::pCTX- <i>rsmY-lacZ</i> (2) | pCTX- <i>rsmY-lacZ-2</i> plasmid was introduced into the $\Delta$ <i>gacA</i> strain by conjugation | This study                         |
| PAK $\Delta$ <i>gacA</i> ::pCTX- <i>rsmY-lacZ</i> (3) | pCTX- <i>rsmY-lacZ-3</i> plasmid was introduced into the $\Delta$ <i>gacA</i> strain by conjugation | This study                         |
| PAK $\Delta$ <i>gacA</i> ::pCTX- <i>rsmZ-lacZ</i> (1) | pCTX- <i>rsmZ-lacZ-1</i> plasmid was introduced into the $\Delta$ <i>gacA</i> strain by conjugation | This study                         |
| PAK $\Delta$ <i>gacA</i> ::pCTX- <i>rsmZ-lacZ</i> (2) | pCTX- <i>rsmZ-lacZ-2</i> plasmid was introduced into the $\Delta$ <i>gacA</i> strain by conjugation | This study                         |
| PAK $\Delta$ <i>gacA</i> ::pCTX- <i>rsmZ-lacZ</i> (3) | pCTX- <i>rsmZ-lacZ-3</i> plasmid was introduced into the $\Delta$ <i>gacA</i> strain by conjugation | This study                         |
| PAK $\Delta$ <i>gacA</i> ::pCTX- <i>rsmZ-lacZ</i> (4) | pCTX- <i>rsmZ-lacZ-4</i> plasmid was introduced into the $\Delta$ <i>gacA</i> strain by conjugation | This study                         |
| <b>Figure 6</b>                                       |                                                                                                     |                                    |
| PAO1 $\Delta$ <i>mvaT</i>                             | deletion mutant                                                                                     | (Diggle <i>et al.</i> , 2002)      |
| PAO1 $\Delta$ <i>mvaU</i>                             | deletion mutant                                                                                     | (Vallet-Gely <i>et al.</i> , 2005) |
| PAO1 $\Delta$ <i>mvaT</i> ::pCTX- <i>rsmY-lacZ</i>    | pCTX- <i>rsmY-lacZ</i> plasmid was introduced into the $\Delta$ <i>mvaT</i> strain by conjugation   | This study                         |
| PAO1 $\Delta$ <i>mvaU</i> ::pCTX- <i>rsmY-lacZ</i>    | pCTX- <i>rsmY-lacZ</i> plasmid was introduced into the $\Delta$ <i>mvaU</i> strain by conjugation   | This study                         |
| PAO1 $\Delta$ <i>mvaT</i> ::pCTX- <i>rsmZ-lacZ</i>    | pCTX- <i>rsmZ-lacZ-1</i> plasmid was introduced into the $\Delta$ <i>mvaT</i> strain by conjugation | This study                         |
| PAO1 $\Delta$ <i>mvaU</i> ::pCTX- <i>rsmZ-lacZ</i>    | pCTX- <i>rsmZ-lacZ-1</i> plasmid was introduced into the $\Delta$ <i>mvaU</i> strain by conjugation | This study                         |
| <b>Figure S1</b>                                      |                                                                                                     |                                    |
| PAK $\Delta$ <i>retS</i> $\Delta$ <i>gacS</i>         | double deletion mutant                                                                              | This study                         |

\* For more detail, see supporting experimental procedures - text.

## SUPPORTING EXPERIMENTAL PROCEDURES – REFERENCES:

- Becher, A., and Schweizer, H.P. (2000) Integration-proficient *Pseudomonas aeruginosa* vectors for isolation of single-copy chromosomal lacZ and lux gene fusions. *Biotechniques* **29**: 948-950, 952.
- Brencic, A., and Lory, S. (2009) Determination of the regulon and identification of novel mRNA targets of *Pseudomonas aeruginosa* RsmA. *Mol Microbiol* **72**: 612-632.
- Castang, S., McManus, H.R., Turner, K.H., and Dove, S.L. (2008) H-NS family members function coordinately in an opportunistic pathogen. *Proc Natl Acad Sci U S A* **105**: 18947-18952.
- Diggle, S.P., Winzer, K., Lazdunski, A., Williams, P., and Camara, M. (2002) Advancing the quorum in *Pseudomonas aeruginosa*: MvaT and the regulation of N-acylhomoserine lactone production and virulence gene expression. *J Bacteriol* **184**: 2576-2586.
- Furste, J.P., Pansegrau, W., Frank, R., Blocker, H., Scholz, P., Bagdasarian, M., and Lanka, E. (1986) Molecular cloning of the plasmid RP4 primase region in a multi-host-range tacP expression vector. *Gene* **48**: 119-131.
- Goodman, A.L., Kulasekara, B., Rietsch, A., Boyd, D., Smith, R.S., and Lory, S. (2004) A signaling network reciprocally regulates genes associated with acute infection and chronic persistence in *Pseudomonas aeruginosa*. *Dev Cell* **7**: 745-754.
- Goodman, A.L., Merighi, M., Hyodo, M., Ventre, I., Filloux, A., and Lory, S. (2009) Direct interaction between sensor kinase proteins mediates acute and chronic disease phenotypes in a bacterial pathogen. *Genes Dev* **23**: 249-259.
- Hoang, T.T., Karkhoff-Schweizer, R.R., Kutchma, A.J., and Schweizer, H.P. (1998) A broad-host-range Flp-FRT recombination system for site-specific excision of chromosomally-located DNA sequences: application for isolation of unmarked *Pseudomonas aeruginosa* mutants. *Gene* **212**: 77-86.
- Rietsch, A., Vallet-Gely, I., Dove, S.L., and Mekalanos, J.J. (2005) ExsE, a secreted regulator of type III secretion genes in *Pseudomonas aeruginosa*. *Proc Natl Acad Sci U S A* **102**: 8006-8011.
- Vallet-Gely, I., Donovan, K.E., Fang, R., Joung, J.K., and Dove, S.L. (2005) Repression of phase-variable cup gene expression by H-NS-like proteins in *Pseudomonas aeruginosa*. *Proc Natl Acad Sci U S A* **102**: 11082-11087.
- Ventre, I., Goodman, A.L., Vallet-Gely, I., Vasseur, P., Soscia, C., Molin, S., Bleves, S., Lazdunski, A., Lory, S., and Filloux, A. (2006) Multiple sensors control reciprocal expression of *Pseudomonas aeruginosa* regulatory RNA and virulence genes. *Proc Natl Acad Sci U S A* **103**: 171-176.
